# Supplementary material for: Glucose exchange parameters in a subset of physiological conditions
Source: Royal Society of Chemistry journal article supplement (doi:10.1039/d3cp01973j), 2023-01-01
Supplement: d3cp01973j1.pdf [file d3cp01973j1.pdf]

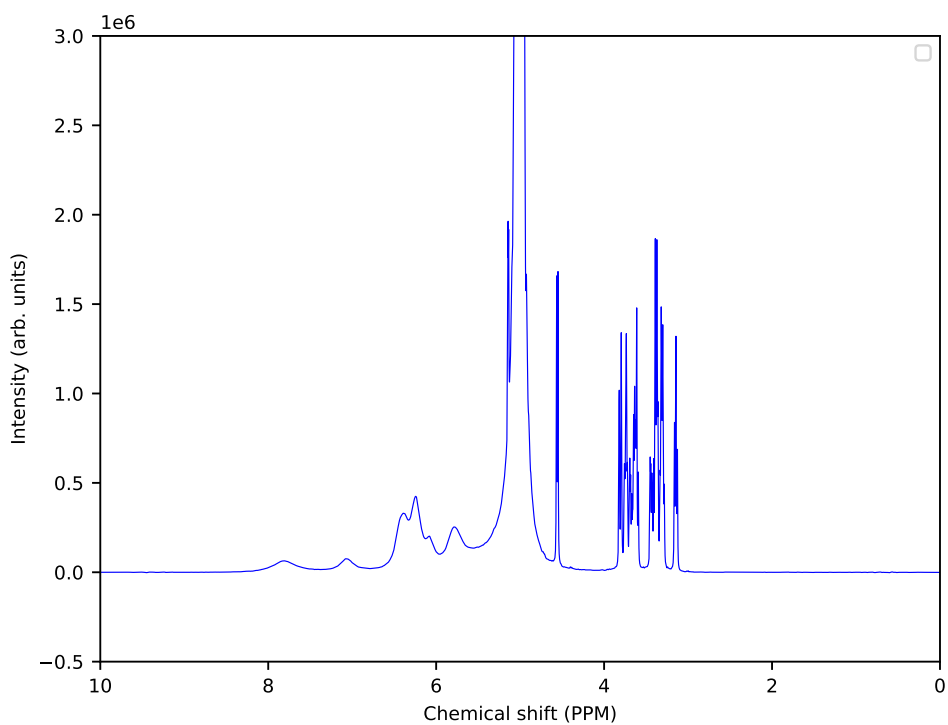

Figure 1: Full proton experimental spectrum of 1M glucose in 1xPBS, pH=7.00, temperature = 270 K at magnetic field of 11.7 T

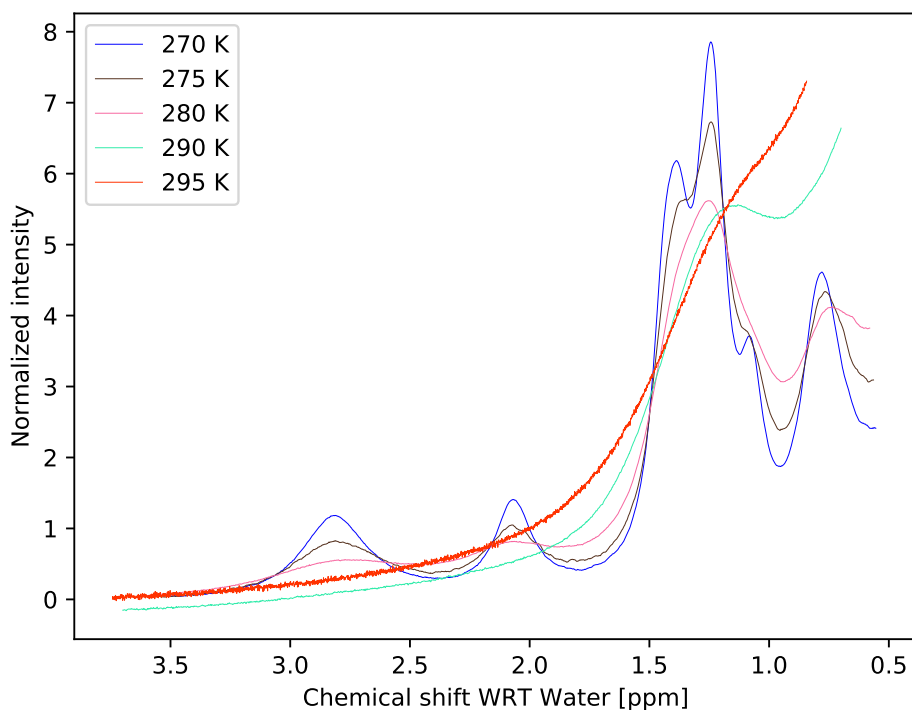

Figure 2: Set of experimental spectra in -OH region of 1M glucose in 1xPBS, pH=7.00, at magnetic field of 11.7 T. At this pH, the spectra lose quickly resolution with increasing temperature.

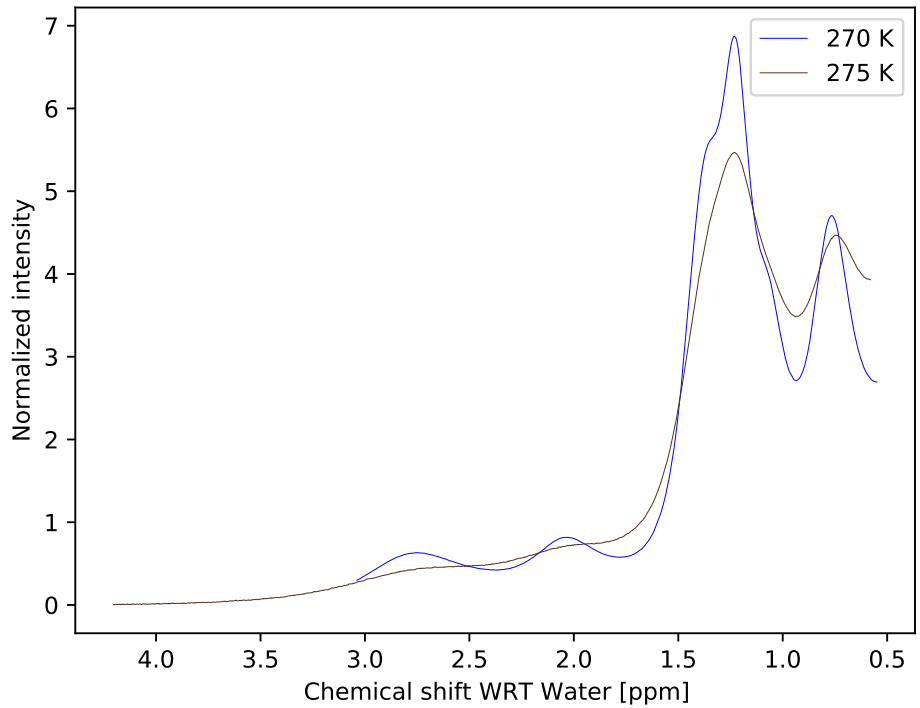

Figure 3: Experimental spectra in -OH region of 1M glucose in 1xPBS, pH=7.38, at magnetic field of 11.7 T. In this pH, already at T=275 K, the resolution is very poor.

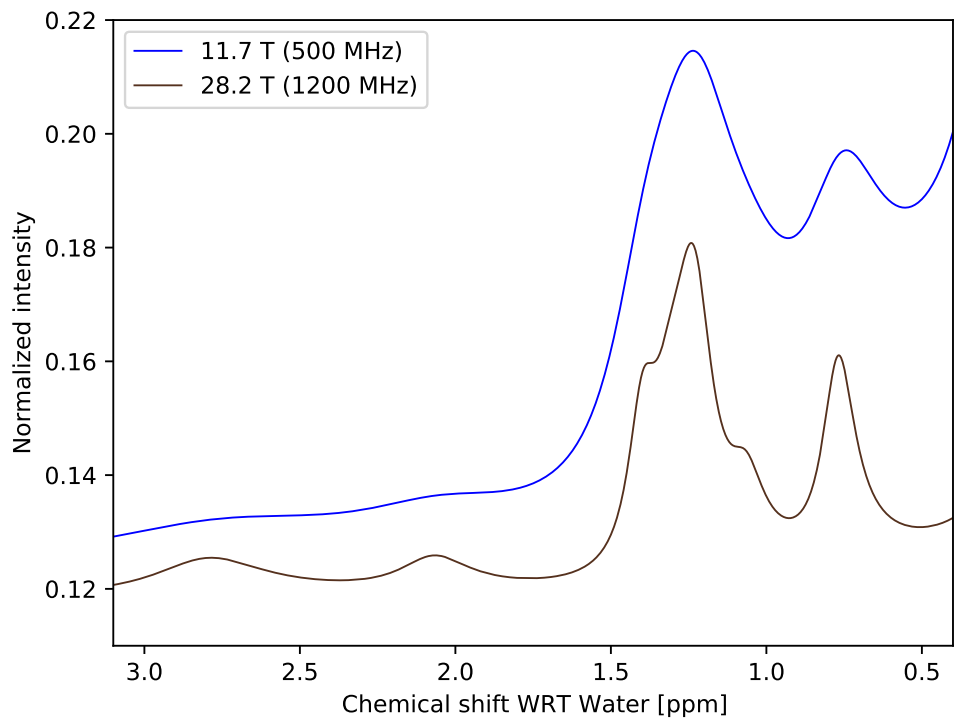

Figure 4: Simulated spectra in -OH region of 1M glucose in 1xPBS, at 275 K (calibrated temperature  $\cong 273.5$  K), pH=7.38, at magnetic fields of 11.7 T and 28.2 T. The ultra high field gives good separation of glucose OH signals as well as their separation from the water signal.

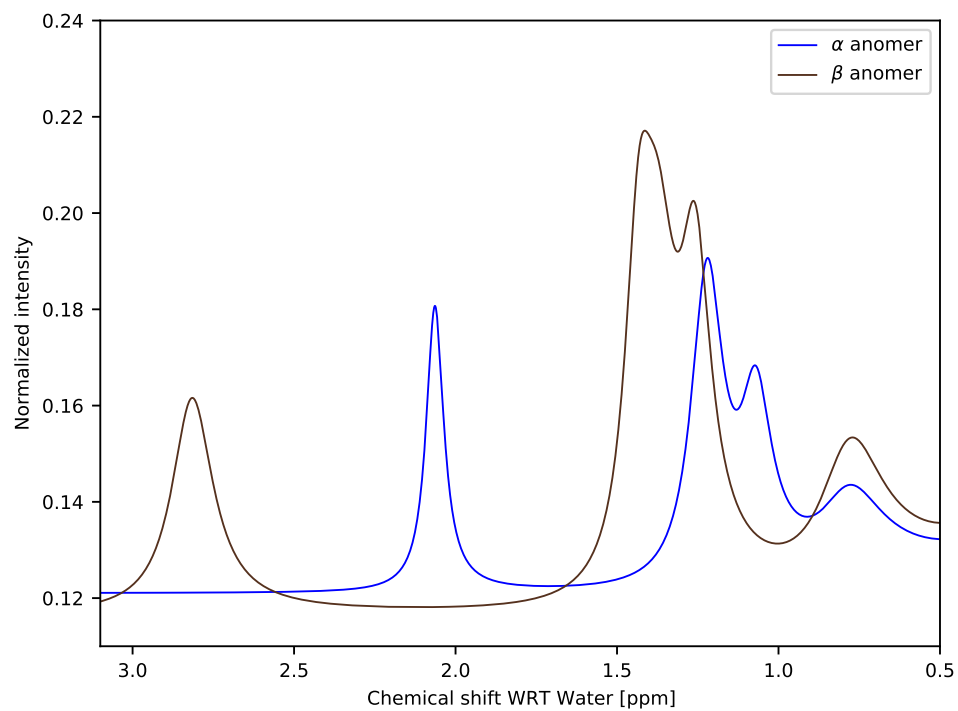

Figure 5: Hypothetical simulated spectra in -OH region of separate  $\alpha$  and  $\beta$  anomers of 1M glucose in 1xPBS, at pH=6.21, temperature = 270 K at magnetic field of 11.7 T

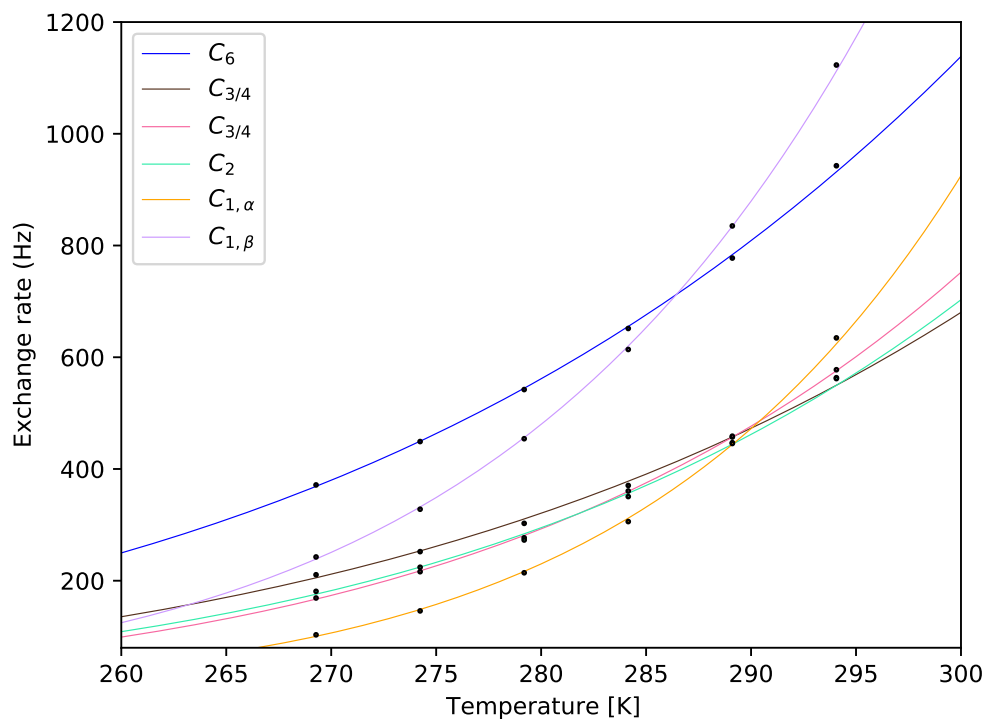

Figure 6: Fits of the temperature series for sample of pH=6.21. Exchange rate obtained by MCMC fit for each site are shown at calibrated temperatures, zoomed around the data points.

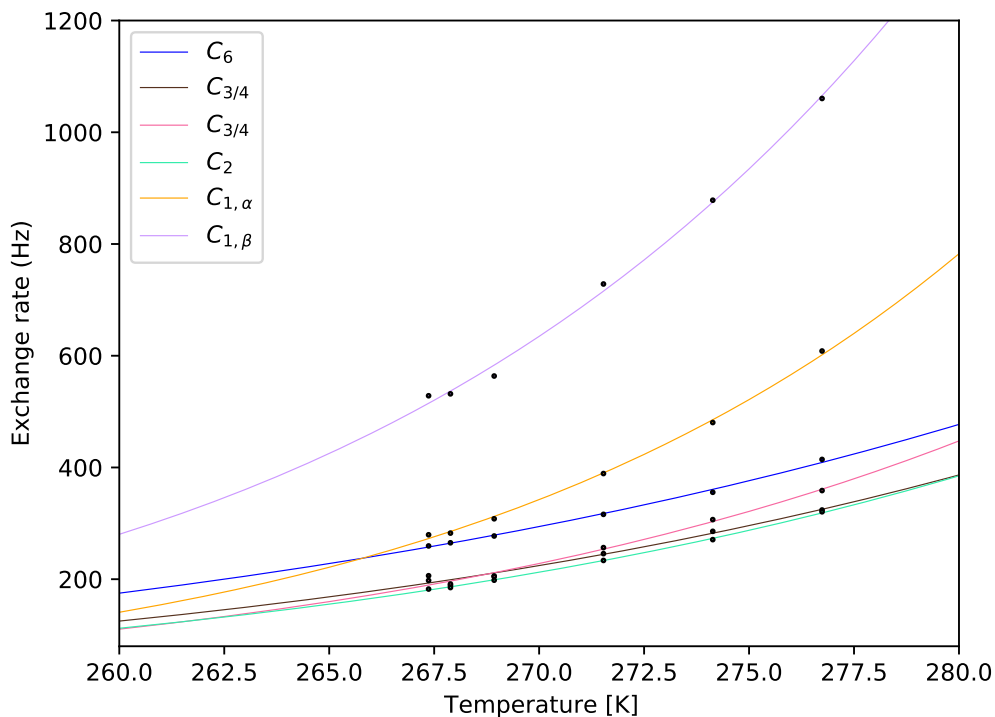

Figure 7: Fits of the temperature series for sample of pH=7.00. Exchange rate obtained by MCMC fit for each site are shown at calibrated temperatures, zoomed around the data points. Note that the lowest-temperature points are systematically out of trend. Removing these points may be considered after rigorous justification.

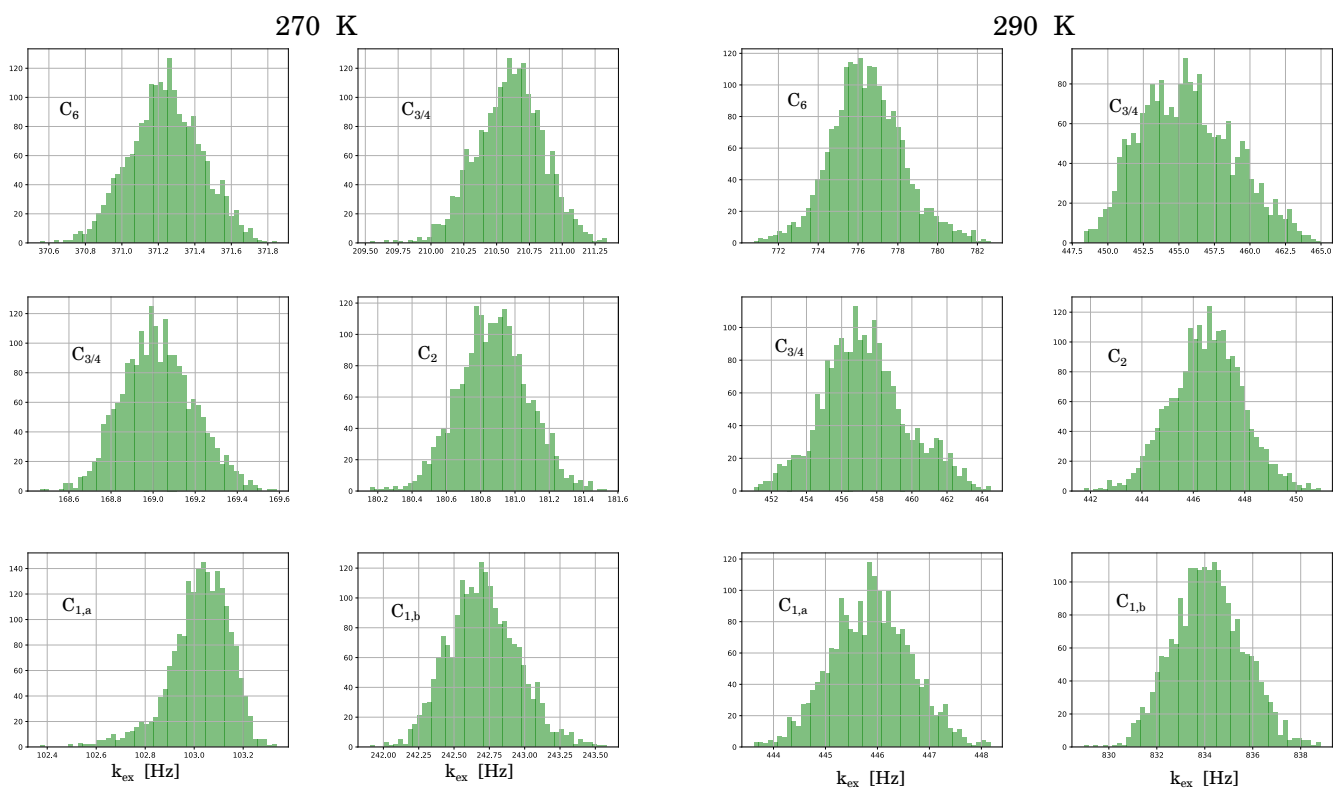

Figure 8: Examples of histograms of exchange rates obtained in MCMC simulations, for sample of pH=6.21, at 270 K and 290 K. The distributions are approximately symmetric.

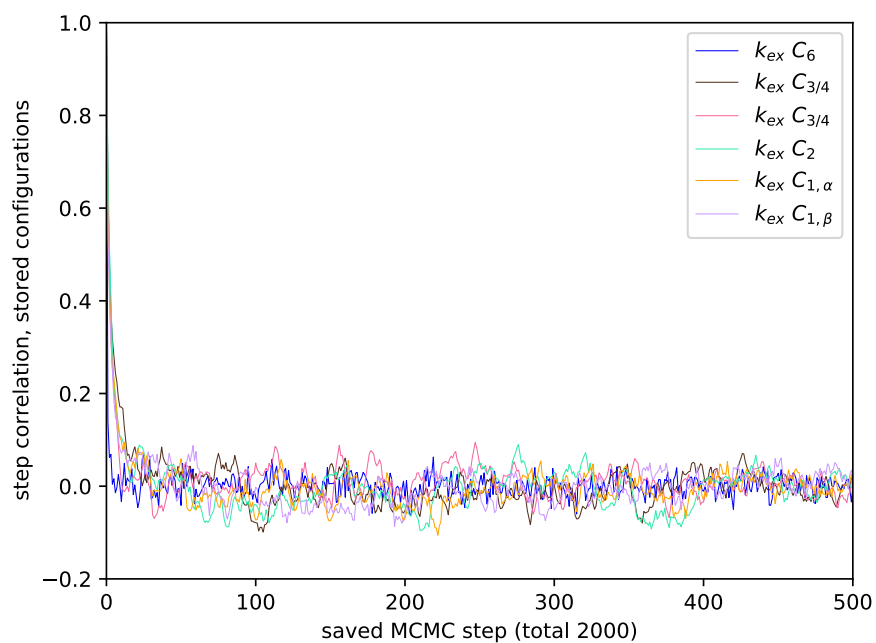

Figure 9: Examples correlation functions of saved steps obtained in MCMC simulations, for sample of pH=6.21, at 270 K. One can see that the correlation time is short on the scale of MCMC simulation, therefore the space is probably sampled well.

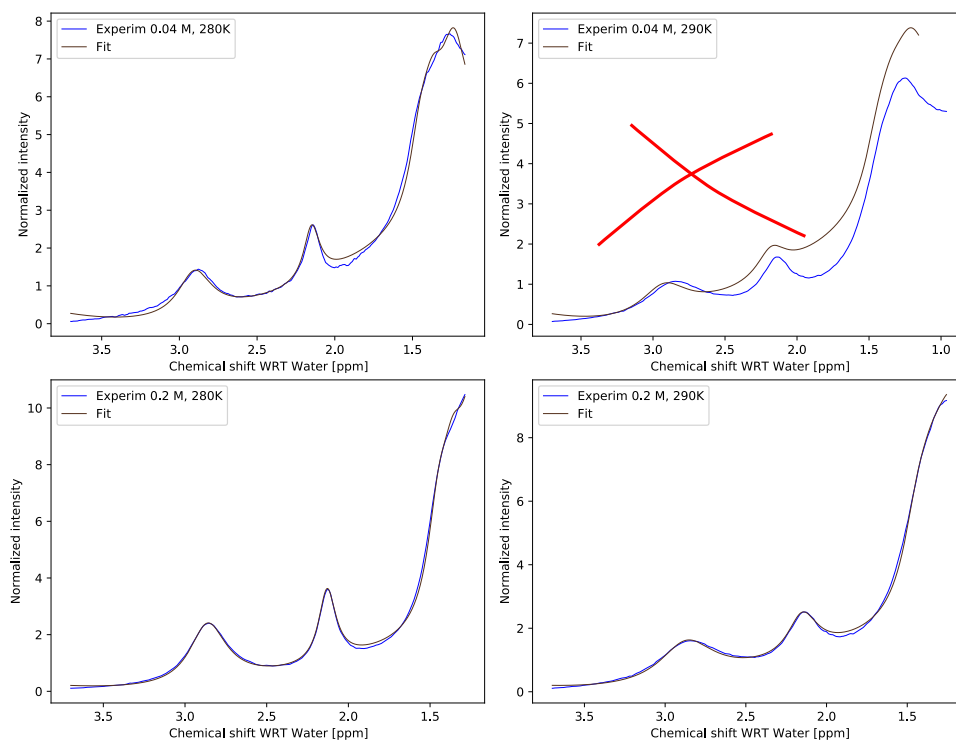

Figure 10: Spectra at low concentration of glucose, pH = 6.21, clearly the fitting for spectrum of 0.04 M glucose at 290 K has to be discarded.

Table 1: Exchange rates extrapolated to 310 K, 1M glucose at pH=6.21, using restricted model, with partial assignment.

| T(K)   | $C_6$         | $C_{3/4}$   | $C_{3/4}$   | $C_2$       | $C_{1,\alpha}$ | $C_{1,\beta}$ |
|--------|---------------|-------------|-------------|-------------|----------------|---------------|
| 260.0  | 249.7 ± 0.8   | 135.5 ± 1.8 | 99.1 ± 0.9  | 108.8 ± 0.5 | 46.46 ± 0.17   | 124.8 ± 0.4   |
| 260.25 | 252.5 ± 0.8   | 137.1 ± 1.8 | 100.5 ± 0.9 | 110.2 ± 0.5 | 47.47 ± 0.17   | 127.1 ± 0.4   |
| 260.5  | 255.2 ± 0.8   | 138.7 ± 1.8 | 102.0 ± 0.9 | 111.7 ± 0.5 | 48.50 ± 0.17   | 129.4 ± 0.4   |
| 260.75 | 258.0 ± 0.8   | 140.3 ± 1.8 | 103.5 ± 0.9 | 113.2 ± 0.5 | 49.55 ± 0.17   | 131.7 ± 0.4   |
| 261.0  | 260.8 ± 0.8   | 141.9 ± 1.8 | 105.0 ± 0.9 | 114.7 ± 0.5 | 50.62 ± 0.18   | 134.1 ± 0.4   |
| 261.25 | 263.6 ± 0.8   | 143.5 ± 1.7 | 106.5 ± 0.9 | 116.3 ± 0.5 | 51.71 ± 0.18   | 136.6 ± 0.4   |
| 261.5  | 266.5 ± 0.8   | 145.2 ± 1.7 | 108.1 ± 0.9 | 117.8 ± 0.5 | 52.82 ± 0.18   | 139.0 ± 0.4   |
| 261.75 | 269.3 ± 0.8   | 146.8 ± 1.7 | 109.6 ± 0.9 | 119.4 ± 0.5 | 53.95 ± 0.18   | 141.5 ± 0.4   |
| 262.0  | 272.2 ± 0.8   | 148.5 ± 1.7 | 111.2 ± 0.9 | 121.0 ± 0.5 | 55.11 ± 0.18   | 144.1 ± 0.4   |
| 262.25 | 275.2 ± 0.8   | 150.2 ± 1.7 | 112.8 ± 0.9 | 122.6 ± 0.5 | 56.29 ± 0.18   | 146.7 ± 0.4   |
| 262.5  | 278.1 ± 0.8   | 151.9 ± 1.7 | 114.5 ± 0.9 | 124.2 ± 0.5 | 57.49 ± 0.18   | 149.3 ± 0.4   |
| 262.75 | 281.1 ± 0.8   | 153.7 ± 1.7 | 116.1 ± 0.9 | 125.8 ± 0.5 | 58.71 ± 0.19   | 152.0 ± 0.4   |
| 263.0  | 284.1 ± 0.8   | 155.4 ± 1.7 | 117.8 ± 0.9 | 127.5 ± 0.5 | 59.96 ± 0.19   | 154.7 ± 0.4   |
| 263.25 | 287.1 ± 0.8   | 157.2 ± 1.6 | 119.4 ± 0.9 | 129.2 ± 0.5 | 61.24 ± 0.19   | 157.4 ± 0.4   |
| 263.5  | 290.2 ± 0.8   | 159.0 ± 1.6 | 121.2 ± 0.9 | 130.9 ± 0.5 | 62.53 ± 0.19   | 160.2 ± 0.4   |
| 263.75 | 293.3 ± 0.7   | 160.8 ± 1.6 | 122.9 ± 0.9 | 132.6 ± 0.5 | 63.85 ± 0.19   | 163.1 ± 0.4   |
| 264.0  | 296.4 ± 0.7   | 162.6 ± 1.6 | 124.6 ± 0.8 | 134.3 ± 0.5 | 65.20 ± 0.19   | 166.0 ± 0.4   |
| 264.25 | 299.6 ± 0.7   | 164.4 ± 1.6 | 126.4 ± 0.8 | 136.1 ± 0.5 | 66.58 ± 0.19   | 168.9 ± 0.4   |
| 264.5  | 302.7 ± 0.7   | 166.3 ± 1.6 | 128.2 ± 0.8 | 137.9 ± 0.5 | 67.98 ± 0.20   | 171.9 ± 0.4   |
| 264.75 | 305.9 ± 0.7   | 168.1 ± 1.5 | 130.0 ± 0.8 | 139.7 ± 0.5 | 69.40 ± 0.20   | 174.9 ± 0.4   |
| 265.0  | 309.1 ± 0.7   | 170.0 ± 1.5 | 131.8 ± 0.8 | 141.5 ± 0.5 | 70.86 ± 0.20   | 178.0 ± 0.4   |
| 265.25 | 312.4 ± 0.7   | 171.9 ± 1.5 | 133.7 ± 0.8 | 143.3 ± 0.5 | 72.34 ± 0.20   | 181.1 ± 0.4   |
| 265.5  | 315.7 ± 0.7   | 173.9 ± 1.5 | 135.6 ± 0.8 | 145.2 ± 0.5 | 73.85 ± 0.20   | 184.3 ± 0.4   |
| 265.75 | 319.0 ± 0.7   | 175.8 ± 1.5 | 137.5 ± 0.8 | 147.0 ± 0.5 | 75.39 ± 0.20   | 187.6 ± 0.4   |
| 266.0  | 322.3 ± 0.7   | 177.8 ± 1.4 | 139.4 ± 0.8 | 148.9 ± 0.5 | 76.95 ± 0.20   | 190.8 ± 0.4   |
| 266.25 | 325.7 ± 0.7   | 179.7 ± 1.4 | 141.4 ± 0.8 | 150.9 ± 0.5 | 78.55 ± 0.21   | 194.2 ± 0.4   |
| 266.5  | 329.1 ± 0.6   | 181.7 ± 1.4 | 143.4 ± 0.8 | 152.8 ± 0.5 | 80.18 ± 0.21   | 197.5 ± 0.4   |
| 266.75 | 332.5 ± 0.6   | 183.8 ± 1.4 | 145.4 ± 0.8 | 154.8 ± 0.5 | 81.84 ± 0.21   | 201.0 ± 0.4   |
| 267.0  | 336.0 ± 0.6   | 185.8 ± 1.4 | 147.4 ± 0.7 | 156.7 ± 0.5 | 83.53 ± 0.21   | 204.5 ± 0.4   |
| 267.25 | 339.5 ± 0.6   | 187.8 ± 1.3 | 149.4 ± 0.7 | 158.7 ± 0.5 | 85.25 ± 0.21   | 208.0 ± 0.4   |
| 267.5  | 343.0 ± 0.6   | 189.9 ± 1.3 | 151.5 ± 0.7 | 160.8 ± 0.5 | 87.00 ± 0.21   | 211.6 ± 0.4   |
| 267.75 | 346.5 ± 0.6   | 192.0 ± 1.3 | 153.6 ± 0.7 | 162.8 ± 0.5 | 88.78 ± 0.21   | 215.2 ± 0.4   |
| 268.0  | 350.1 ± 0.6   | 194.1 ± 1.3 | 155.7 ± 0.7 | 164.9 ± 0.5 | 90.60 ± 0.21   | 219.0 ± 0.4   |
| 268.25 | 353.7 ± 0.6   | 196.2 ± 1.2 | 157.9 ± 0.7 | 167.0 ± 0.5 | 92.46 ± 0.21   | 222.7 ± 0.4   |
| 268.5  | 357.4 ± 0.6   | 198.4 ± 1.2 | 160.0 ± 0.7 | 169.1 ± 0.5 | 94.34 ± 0.21   | 226.5 ± 0.4   |
| 268.75 | 361.0 ± 0.6   | 200.5 ± 1.2 | 162.2 ± 0.7 | 171.2 ± 0.4 | 96.27 ± 0.22   | 230.4 ± 0.4   |
| 269.0  | 364.7 ± 0.5   | 202.7 ± 1.2 | 164.5 ± 0.7 | 173.4 ± 0.4 | 98.22 ± 0.22   | 234.4 ± 0.4   |
| 269.25 | 368.4 ± 0.5   | 204.9 ± 1.1 | 166.7 ± 0.6 | 175.6 ± 0.4 | 100.22 ± 0.22  | 238.4 ± 0.4   |
| 269.5  | 372.2 ± 0.5   | 207.2 ± 1.1 | 169.0 ± 0.6 | 177.8 ± 0.4 | 102.25 ± 0.22  | 242.4 ± 0.4   |
| 269.75 | 376.0 ± 0.5   | 209.4 ± 1.1 | 171.3 ± 0.6 | 180.0 ± 0.4 | 104.32 ± 0.22  | 246.5 ± 0.4   |
| 270.0  | 379.8 ± 0.5   | 211.7 ± 1.0 | 173.6 ± 0.6 | 182.3 ± 0.4 | 106.42 ± 0.22  | 250.7 ± 0.4   |
| 270.25 | 383.7 ± 0.5   | 214.0 ± 1.0 | 176.0 ± 0.6 | 184.6 ± 0.4 | 108.57 ± 0.22  | 255.0 ± 0.4   |
| 270.5  | 387.6 ± 0.5   | 216.3 ± 1.0 | 178.4 ± 0.6 | 186.9 ± 0.4 | 110.75 ± 0.22  | 259.3 ± 0.4   |
| 270.75 | 391.5 ± 0.5   | 218.6 ± 1.0 | 180.8 ± 0.6 | 189.2 ± 0.4 | 112.98 ± 0.22  | 263.7 ± 0.4   |
| 271.0  | 395.5 ± 0.4   | 221.0 ± 0.9 | 183.3 ± 0.5 | 191.6 ± 0.4 | 115.24 ± 0.22  | 268.1 ± 0.4   |
| 271.25 | 399.4 ± 0.4   | 223.3 ± 0.9 | 185.7 ± 0.5 | 193.9 ± 0.4 | 117.55 ± 0.22  | 272.6 ± 0.4   |
| 271.5  | 403.5 ± 0.4   | 225.7 ± 0.9 | 188.2 ± 0.5 | 196.3 ± 0.4 | 119.89 ± 0.22  | 277.2 ± 0.4   |
| 271.75 | 407.5 ± 0.4   | 228.1 ± 0.8 | 190.8 ± 0.5 | 198.8 ± 0.4 | 122.28 ± 0.23  | 281.8 ± 0.4   |
| 272.0  | 411.6 ± 0.4   | 230.6 ± 0.8 | 193.3 ± 0.5 | 201.2 ± 0.4 | 124.72 ± 0.23  | 286.5 ± 0.4   |
| 272.25 | 415.7 ± 0.4   | 233.0 ± 0.8 | 195.9 ± 0.5 | 203.7 ± 0.4 | 127.19 ± 0.23  | 291.3 ± 0.4   |
| 272.5  | 419.9 ± 0.4   | 235.5 ± 0.7 | 198.6 ± 0.5 | 206.2 ± 0.4 | 129.71 ± 0.23  | 296.2 ± 0.4   |
| 272.75 | 424.1 ± 0.4   | 238.0 ± 0.7 | 201.2 ± 0.4 | 208.8 ± 0.4 | 132.28 ± 0.23  | 301.1 ± 0.4   |
| 273.0  | 428.3 ± 0.4   | 240.5 ± 0.7 | 203.9 ± 0.4 | 211.3 ± 0.4 | 134.89 ± 0.23  | 306.1 ± 0.4   |
| 273.25 | 432.5 ± 0.4   | 243.1 ± 0.7 | 206.6 ± 0.4 | 213.9 ± 0.4 | 137.55 ± 0.23  | 311.2 ± 0.4   |
| 273.5  | 436.84 ± 0.35 | 245.6 ± 0.6 | 209.3 ± 0.4 | 216.5 ± 0.4 | 140.26 ± 0.23  | 316.3 ± 0.4   |
| 273.75 | 441.17 ± 0.34 | 248.2 ± 0.6 | 212.1 ± 0.4 | 219.2 ± 0.4 | 143.02 ± 0.23  | 321.6 ± 0.4   |
| 274.0  | 445.53 ± 0.34 | 250.8 ± 0.6 | 214.9 ± 0.4 | 221.8 ± 0.4 | 145.82 ± 0.23  | 326.9 ± 0.4   |
| 274.25 | 449.93 ± 0.33 | 253.5 ± 0.6 | 217.8 ± 0.4 | 224.5 ± 0.4 | 148.68 ± 0.23  | 332.2 ± 0.4   |
| 274.5  | 454.36 ± 0.33 | 256.1 ± 0.6 | 220.6 ± 0.4 | 227.3 ± 0.4 | 151.58 ± 0.23  | 337.7 ± 0.4   |
| 274.75 | 458.83 ± 0.33 | 258.8 ± 0.6 | 223.6 ± 0.4 | 230.0 ± 0.4 | 154.54 ± 0.23  | 343.2 ± 0.4   |
| 275.0  | 463.34 ± 0.33 | 261.5 ± 0.6 | 226.5 ± 0.4 | 232.8 ± 0.4 | 157.55 ± 0.24  | 348.9 ± 0.4   |
| 275.25 | 467.88 ± 0.33 | 264.2 ± 0.6 | 229.5 ± 0.4 | 235.6 ± 0.4 | 160.61 ± 0.24  | 354.6 ± 0.4   |
| 275.5  | 472.46 ± 0.34 | 267.0 ± 0.6 | 232.5 ± 0.4 | 238.4 ± 0.4 | 163.73 ± 0.24  | 360.3 ± 0.4   |
| 275.75 | 477.08 ± 0.34 | 269.8 ± 0.6 | 235.5 ± 0.4 | 241.3 ± 0.4 | 166.90 ± 0.24  | 366.2 ± 0.4   |
| 276.0  | 481.73 ± 0.35 | 272.6 ± 0.6 | 238.6 ± 0.4 | 244.2 ± 0.4 | 170.12 ± 0.24  | 372.2 ± 0.4   |
| 276.25 | 486.4 ± 0.4   | 275.4 ± 0.6 | 241.7 ± 0.4 | 247.1 ± 0.4 | 173.41 ± 0.24  | 378.2 ± 0.4   |
| 276.5  | 491.1 ± 0.4   | 278.2 ± 0.6 | 244.8 ± 0.4 | 250.1 ± 0.4 | 176.75 ± 0.24  | 384.3 ± 0.4   |
| 276.75 | 495.9 ± 0.4   | 281.1 ± 0.7 | 248.0 ± 0.4 | 253.1 ± 0.4 | 180.15 ± 0.25  | 390.5 ± 0.4   |
| 277.0  | 500.7 ± 0.4   | 284.0 ± 0.7 | 251.2 ± 0.5 | 256.1 ± 0.4 | 183.61 ± 0.25  | 396.8 ± 0.4   |
| 277.25 | 505.6 ± 0.4   | 286.9 ± 0.7 | 254.5 ± 0.5 | 259.2 ± 0.4 | 187.12 ± 0.25  | 403.2 ± 0.4   |
| 277.5  | 510.4 ± 0.4   | 289.9 ± 0.8 | 257.8 ± 0.5 | 262.2 ± 0.4 | 190.70 ± 0.25  | 409.7 ± 0.4   |
| 277.75 | 515.4 ± 0.4   | 292.9 ± 0.8 | 261.1 ± 0.5 | 265.4 ± 0.4 | 194.34 ± 0.25  | 416.3 ± 0.4   |
| 278.0  | 520.3 ± 0.5   | 295.9 ± 0.9 | 264.5 ± 0.6 | 268.5 ± 0.4 | 198.05 ± 0.26  | 423.0 ± 0.4   |
| 278.25 | 525.3 ± 0.5   | 298.9 ± 0.9 | 267.9 ± 0.6 | 271.7 ± 0.4 | 201.82 ± 0.26  | 429.7 ± 0.4   |
| 278.5  | 530.3 ± 0.5   | 301.9 ± 1.0 | 271.3 ± 0.6 | 274.9 ± 0.4 | 205.65 ± 0.26  | 436.6 ± 0.4   |
| 278.75 | 535.4 ± 0.5   | 305.0 ± 1.0 | 274.8 ± 0.7 | 278.1 ± 0.5 | 209.55 ± 0.27  | 443.6 ± 0.5   |
| 279.0  | 540.5 ± 0.6   | 308.1 ± 1.1 | 278.3 ± 0.7 | 281.4 ± 0.5 | 213.51 ± 0.27  | 450.6 ± 0.5   |
| 279.25 | 545.7 ± 0.6   | 311.2 ± 1.1 | 281.8 ± 0.7 | 284.7 ± 0.5 | 217.55 ± 0.28  | 457.8 ± 0.5   |
| 279.5  | 550.9 ± 0.6   | 314.4 ± 1.2 | 285.4 ± 0.8 | 288.0 ± 0.5 | 221.65 ± 0.28  | 465.0 ± 0.5   |
| 279.75 | 556.1 ± 0.6   | 317.6 ± 1.3 | 289.1 ± 0.8 | 291.4 ± 0.5 | 225.82 ± 0.28  | 472.4 ± 0.5   |
| 280.0  | 561.4 ± 0.7   | 320.8 ± 1.3 | 292.7 ± 0.9 | 294.8 ± 0.5 | 230.06 ± 0.29  | 479.9 ± 0.5   |
| 280.25 | 566.7 ± 0.7   | 324.0 ± 1.4 | 296.4 ± 0.9 | 298.2 ± 0.5 | 234.38 ± 0.30  | 487.4 ± 0.5   |
| 280.5  | 572.1 ± 0.7   | 327.3 ± 1.5 | 300.2 ± 1.0 | 301.7 ± 0.6 | 238.77 ± 0.30  | 495.1 ± 0.6   |
| 280.75 | 577.5 ± 0.7   | 330.5 ± 1.5 | 304.0 ± 1.0 | 305.2 ± 0.6 | 243.23 ± 0.31  | 502.9 ± 0.6   |
| 281.0  | 582.9 ± 0.8   | 333.9 ± 1.6 | 307.8 ± 1.1 | 308.8 ± 0.6 | 247.77 ± 0.31  | 510.8 ± 0.6   |
| 281.25 | 588.4 ± 0.8   | 337.2 ± 1.7 | 311.7 ± 1.1 | 312.3 ± 0.6 | 252.39 ± 0.32  | 518.8 ± 0.6   |
| 281.5  | 593.9 ± 0.8   | 340.6 ± 1.8 | 315.6 ± 1.2 | 316.0 ± 0.6 | 257.08 ± 0.33  | 526.9 ± 0.6   |
| 281.75 | 599.5 ± 0.9   | 344.0 ± 1.9 | 319.6 ± 1.2 | 319.6 ± 0.6 | 261.85 ± 0.34  | 535.1 ± 0.7   |
| 282.0  | 605.1 ± 0.9   | 347.4 ± 1.9 | 323.6 ± 1.3 | 323.3 ± 0.7 | 266.70 ± 0.35  | 543.5 ± 0.7   |
| 282.25 | 610.8 ± 0.9   | 350.9 ± 2.0 | 327.6 ± 1.3 | 327.0 ± 0.7 | 271.64 ± 0.35  | 551.9 ± 0.7   |
| 282.5  | 616.5 ± 1.0   | 354.3 ± 2.1 | 331.7 ± 1.4 | 330.8 ± 0.7 | 276.7 ± 0.4    | 560.5 ± 0.7   |
| 282.75 | 622.2 ± 1.0   | 357.8 ± 2.2 | 335.8 ± 1.4 | 334.6 ± 0.7 | 281.8 ± 0.4    | 569.2 ± 0.8   |
| 283.0  | 628.0 ± 1.0   | 361.4 ± 2.3 | 340.0 ± 1.5 | 338.4 ± 0.8 | 286.9 ± 0.4    | 578.0 ± 0.8   |
| 283.25 | 633.8 ± 1.1   | 365.0 ± 2.4 | 344.2 ± 1.5 | 342.2 ± 0.8 | 292.2 ± 0.4    | 586.9 ± 0.8   |
| 283.5  | 639.7 ± 1.1   | 368.5 ± 2.4 | 348.5 ± 1.6 | 346.1 ± 0.8 | 297.6 ± 0.4    | 596.0 ± 0.9   |
| 283.75 | 645.6 ± 1.2   | 372.2 ± 2.5 | 352.8 ± 1.7 | 350.1 ± 0.8 | 303.0 ± 0.4    | 605.2 ± 0.9   |
| 284.0  | 651.6 ± 1.2   | 375.8 ± 2.6 | 357.2 ± 1.7 | 354.1 ± 0.9 | 308.6 ± 0.4    | 614.5 ± 0.9   |
| 284.25 | 657.6 ± 1.2   | 379.5 ± 2.7 | 361.6 ± 1.8 | 358.1 ± 0.9 | 314.2 ± 0.4    | 623.9 ± 1.0   |
| 284.5  | 663.6 ± 1.3   | 383.2 ± 2.8 | 366.0 ± 1.9 | 362.1 ± 0.9 | 319.9 ± 0.5    | 633.4 ± 1.0   |
| 284.75 | 669.7 ± 1.3   | 387.0 ± 2.9 | 370.5 ± 1.9 | 366.2 ± 0.9 | 325.7 ± 0.5    | 643.1 ± 1.0   |
| 285.0  | 675.9 ± 1.4   | 390.8 ± 3.0 | 375.1 ± 2.0 | 370.4 ± 1.0 | 331.6 ± 0.5    | 652.9 ± 1.1   |

Table 2: CONT: Exchange rates extrapolated to 310 K, 1M glucose at pH=6.21, using restricted model, with partial assignment.

| T(K)   | $C_6$       | $C_{3/4}$   | $C_{3/4}$   | $C_2$       | $C_{1,\alpha}$ | $C_{1,\beta}$ |
|--------|-------------|-------------|-------------|-------------|----------------|---------------|
| 285.25 | 682.0 ± 1.4 | 394.6 ± 3.1 | 379.7 ± 2.1 | 374.5 ± 1.0 | 337.6 ± 0.5    | 662.9 ± 1.1   |
| 285.5  | 688.3 ± 1.4 | 398.4 ± 3.2 | 384.3 ± 2.2 | 378.8 ± 1.0 | 343.7 ± 0.5    | 673.0 ± 1.1   |
| 285.75 | 694.6 ± 1.5 | 402.3 ± 3.3 | 389.0 ± 2.2 | 383.0 ± 1.1 | 349.9 ± 0.5    | 683.2 ± 1.2   |
| 286.0  | 700.9 ± 1.5 | 406.2 ± 3.4 | 393.7 ± 2.3 | 387.3 ± 1.1 | 356.3 ± 0.6    | 693.6 ± 1.2   |
| 286.25 | 707.3 ± 1.6 | 410.1 ± 3.5 | 398.5 ± 2.4 | 391.6 ± 1.1 | 362.7 ± 0.6    | 704.1 ± 1.3   |
| 286.5  | 713.7 ± 1.6 | 414 ± 4     | 403.4 ± 2.5 | 396.0 ± 1.2 | 369.2 ± 0.6    | 714.7 ± 1.3   |
| 286.75 | 720.2 ± 1.7 | 418 ± 4     | 408.3 ± 2.5 | 400.4 ± 1.2 | 375.8 ± 0.6    | 725.5 ± 1.3   |
| 287.0  | 726.7 ± 1.7 | 422 ± 4     | 413.2 ± 2.6 | 404.9 ± 1.2 | 382.5 ± 0.6    | 736.4 ± 1.4   |
| 287.25 | 733.2 ± 1.8 | 426 ± 4     | 418.2 ± 2.7 | 409.4 ± 1.3 | 389.4 ± 0.7    | 747.5 ± 1.4   |
| 287.5  | 739.8 ± 1.8 | 430 ± 4     | 423.2 ± 2.8 | 414.0 ± 1.3 | 396.3 ± 0.7    | 758.7 ± 1.5   |
| 287.75 | 746.5 ± 1.9 | 434 ± 4     | 428.3 ± 2.9 | 418.5 ± 1.3 | 403.4 ± 0.7    | 770.0 ± 1.5   |
| 288.0  | 753.2 ± 1.9 | 438 ± 4     | 433.5 ± 3.0 | 423.2 ± 1.4 | 410.5 ± 0.7    | 781.6 ± 1.6   |
| 288.25 | 760.0 ± 2.0 | 443 ± 4     | 438.7 ± 3.1 | 427.8 ± 1.4 | 417.8 ± 0.7    | 793.2 ± 1.6   |
| 288.5  | 766.8 ± 2.0 | 447 ± 5     | 443.9 ± 3.2 | 432.6 ± 1.4 | 425.2 ± 0.8    | 805.1 ± 1.7   |
| 288.75 | 773.6 ± 2.1 | 451 ± 5     | 449.2 ± 3.2 | 437.3 ± 1.5 | 432.7 ± 0.8    | 817.0 ± 1.7   |
| 289.0  | 780.6 ± 2.1 | 455 ± 5     | 454.6 ± 3.3 | 442.1 ± 1.5 | 440.4 ± 0.8    | 829.2 ± 1.8   |
| 289.25 | 787.5 ± 2.2 | 460 ± 5     | 460.0 ± 3.4 | 447.0 ± 1.6 | 448.1 ± 0.8    | 841.5 ± 1.8   |
| 289.5  | 794.5 ± 2.2 | 464 ± 5     | 465.5 ± 3.5 | 451.9 ± 1.6 | 456.0 ± 0.9    | 853.9 ± 1.9   |
| 289.75 | 801.6 ± 2.3 | 469 ± 5     | 471 ± 4     | 456.8 ± 1.6 | 464.0 ± 0.9    | 866.5 ± 2.0   |
| 290.0  | 808.7 ± 2.3 | 473 ± 5     | 477 ± 4     | 461.8 ± 1.7 | 472.2 ± 0.9    | 879.3 ± 2.0   |
| 290.25 | 815.9 ± 2.4 | 477 ± 5     | 482 ± 4     | 466.8 ± 1.7 | 480.4 ± 1.0    | 892.3 ± 2.1   |
| 290.5  | 823.1 ± 2.5 | 482 ± 6     | 488 ± 4     | 471.9 ± 1.8 | 488.8 ± 1.0    | 905.4 ± 2.1   |
| 290.75 | 830.3 ± 2.5 | 486 ± 6     | 494 ± 4     | 477.0 ± 1.8 | 497.4 ± 1.0    | 918.7 ± 2.2   |
| 291.0  | 837.7 ± 2.6 | 491 ± 6     | 500 ± 4     | 482.2 ± 1.9 | 506.0 ± 1.1    | 932.1 ± 2.3   |
| 291.25 | 845.0 ± 2.6 | 496 ± 6     | 505 ± 4     | 487.4 ± 1.9 | 514.8 ± 1.1    | 945.8 ± 2.3   |
| 291.5  | 852.5 ± 2.7 | 500 ± 6     | 511 ± 4     | 492.7 ± 2.0 | 523.8 ± 1.1    | 959.6 ± 2.4   |
| 291.75 | 859.9 ± 2.8 | 505 ± 6     | 517 ± 4     | 498.0 ± 2.0 | 532.9 ± 1.2    | 973.6 ± 2.5   |
| 292.0  | 867.5 ± 2.8 | 510 ± 6     | 523 ± 5     | 503.4 ± 2.1 | 542.1 ± 1.2    | 987.8 ± 2.5   |
| 292.25 | 875.0 ± 2.9 | 514 ± 7     | 530 ± 5     | 508.8 ± 2.1 | 551.4 ± 1.2    | 1002.1 ± 2.6  |
| 292.5  | 882.7 ± 2.9 | 519 ± 7     | 536 ± 5     | 514.3 ± 2.2 | 560.9 ± 1.3    | 1016.7 ± 2.7  |
| 292.75 | 890.4 ± 3.0 | 524 ± 7     | 542 ± 5     | 519.8 ± 2.2 | 570.6 ± 1.3    | 1031.4 ± 2.8  |
| 293.0  | 898.1 ± 3.1 | 529 ± 7     | 548 ± 5     | 525.3 ± 2.3 | 580.4 ± 1.3    | 1046.3 ± 2.8  |
| 293.25 | 905.9 ± 3.1 | 534 ± 7     | 555 ± 5     | 531.0 ± 2.3 | 590.4 ± 1.4    | 1061.4 ± 2.9  |
| 293.5  | 913.8 ± 3.2 | 539 ± 7     | 561 ± 5     | 536.6 ± 2.4 | 600.5 ± 1.4    | 1076.7 ± 3.0  |
| 293.75 | 921.7 ± 3.3 | 543 ± 8     | 568 ± 5     | 542.3 ± 2.4 | 610.7 ± 1.5    | 1092.2 ± 3.1  |
| 294.0  | 929.6 ± 3.3 | 548 ± 8     | 574 ± 6     | 548.1 ± 2.5 | 621.2 ± 1.5    | 1107.9 ± 3.1  |
| 294.25 | 937.7 ± 3.4 | 554 ± 8     | 581 ± 6     | 553.9 ± 2.5 | 631.8 ± 1.6    | 1123.8 ± 3.2  |
| 294.5  | 945.7 ± 3.5 | 559 ± 8     | 587 ± 6     | 559.8 ± 2.6 | 642.5 ± 1.6    | 1139.9 ± 3.3  |
| 294.75 | 954 ± 4     | 564 ± 8     | 594 ± 6     | 565.7 ± 2.6 | 653.4 ± 1.7    | 1156.1 ± 3.4  |
| 295.0  | 962 ± 4     | 569 ± 8     | 601 ± 6     | 571.7 ± 2.7 | 664.5 ± 1.7    | 1172.6 ± 3.5  |
| 295.25 | 970 ± 4     | 574 ± 9     | 608 ± 6     | 577.7 ± 2.8 | 675.7 ± 1.8    | 1189 ± 4      |
| 295.5  | 979 ± 4     | 579 ± 9     | 615 ± 6     | 583.8 ± 2.8 | 687.2 ± 1.8    | 1206 ± 4      |
| 295.75 | 987 ± 4     | 585 ± 9     | 622 ± 7     | 589.9 ± 2.9 | 698.8 ± 1.9    | 1223 ± 4      |
| 296.0  | 995 ± 4     | 590 ± 9     | 629 ± 7     | 596.1 ± 2.9 | 710.5 ± 1.9    | 1241 ± 4      |
| 296.25 | 1004 ± 4    | 595 ± 9     | 636 ± 7     | 602.4 ± 3.0 | 722.5 ± 2.0    | 1258 ± 4      |
| 296.5  | 1012 ± 4    | 601 ± 10    | 643 ± 7     | 608.7 ± 3.1 | 734.6 ± 2.0    | 1276 ± 4      |
| 296.75 | 1021 ± 4    | 606 ± 10    | 651 ± 7     | 615.0 ± 3.1 | 746.9 ± 2.1    | 1294 ± 4      |
| 297.0  | 1030 ± 4    | 611 ± 10    | 658 ± 7     | 621.4 ± 3.2 | 759.4 ± 2.1    | 1312 ± 4      |
| 297.25 | 1038 ± 4    | 617 ± 10    | 665 ± 8     | 627.9 ± 3.3 | 772.1 ± 2.2    | 1331 ± 4      |
| 297.5  | 1047 ± 4    | 622 ± 10    | 673 ± 8     | 634.4 ± 3.3 | 785.0 ± 2.3    | 1349 ± 4      |
| 297.75 | 1056 ± 4    | 628 ± 10    | 680 ± 8     | 641.0 ± 3.4 | 798.0 ± 2.3    | 1368 ± 5      |
| 298.0  | 1065 ± 5    | 634 ± 11    | 688 ± 8     | 647.6 ± 3.5 | 811.3 ± 2.4    | 1387 ± 5      |
| 298.25 | 1074 ± 5    | 639 ± 11    | 696 ± 8     | 654 ± 4     | 824.8 ± 2.5    | 1407 ± 5      |
| 298.5  | 1083 ± 5    | 645 ± 11    | 704 ± 8     | 661 ± 4     | 838.4 ± 2.5    | 1426 ± 5      |
| 298.75 | 1092 ± 5    | 651 ± 11    | 712 ± 9     | 668 ± 4     | 852.3 ± 2.6    | 1446 ± 5      |
| 299.0  | 1101 ± 5    | 657 ± 12    | 719 ± 9     | 675 ± 4     | 866.4 ± 2.7    | 1466 ± 5      |
| 299.25 | 1110 ± 5    | 662 ± 12    | 728 ± 9     | 682 ± 4     | 880.7 ± 2.7    | 1487 ± 5      |
| 299.5  | 1120 ± 5    | 668 ± 12    | 736 ± 9     | 689 ± 4     | 895.2 ± 2.8    | 1507 ± 5      |
| 299.75 | 1129 ± 5    | 674 ± 12    | 744 ± 9     | 696 ± 4     | 909.9 ± 2.9    | 1528 ± 6      |
| 300.0  | 1138 ± 5    | 680 ± 12    | 752 ± 9     | 703 ± 4     | 924.8 ± 3.0    | 1549 ± 6      |
| 300.25 | 1148 ± 5    | 686 ± 13    | 760 ± 10    | 710 ± 4     | 940.0 ± 3.0    | 1571 ± 6      |
| 300.5  | 1157 ± 5    | 692 ± 13    | 769 ± 10    | 717 ± 4     | 955.3 ± 3.1    | 1592 ± 6      |
| 300.75 | 1167 ± 6    | 698 ± 13    | 777 ± 10    | 725 ± 4     | 970.9 ± 3.2    | 1614 ± 6      |
| 301.0  | 1176 ± 6    | 705 ± 13    | 786 ± 10    | 732 ± 4     | 986.7 ± 3.3    | 1636 ± 6      |
| 301.25 | 1186 ± 6    | 711 ± 14    | 795 ± 10    | 739 ± 4     | 1002.8 ± 3.4   | 1659 ± 6      |
| 301.5  | 1196 ± 6    | 717 ± 14    | 803 ± 11    | 747 ± 5     | 1019.1 ± 3.5   | 1681 ± 7      |
| 301.75 | 1206 ± 6    | 723 ± 14    | 812 ± 11    | 754 ± 5     | 1035.6 ± 3.5   | 1704 ± 7      |
| 302.0  | 1216 ± 6    | 729 ± 14    | 821 ± 11    | 762 ± 5     | 1052 ± 4       | 1728 ± 7      |
| 302.25 | 1226 ± 6    | 736 ± 15    | 830 ± 11    | 770 ± 5     | 1069 ± 4       | 1751 ± 7      |
| 302.5  | 1236 ± 6    | 742 ± 15    | 839 ± 12    | 777 ± 5     | 1087 ± 4       | 1775 ± 7      |
| 302.75 | 1246 ± 6    | 749 ± 15    | 848 ± 12    | 785 ± 5     | 1104 ± 4       | 1799 ± 7      |
| 303.0  | 1256 ± 6    | 755 ± 15    | 857 ± 12    | 793 ± 5     | 1122 ± 4       | 1823 ± 7      |
| 303.25 | 1266 ± 7    | 762 ± 16    | 867 ± 12    | 801 ± 5     | 1140 ± 4       | 1848 ± 8      |
| 303.5  | 1276 ± 7    | 768 ± 16    | 876 ± 12    | 809 ± 5     | 1158 ± 4       | 1873 ± 8      |
| 303.75 | 1287 ± 7    | 775 ± 16    | 886 ± 13    | 817 ± 5     | 1177 ± 4       | 1898 ± 8      |
| 304.0  | 1297 ± 7    | 782 ± 16    | 895 ± 13    | 825 ± 5     | 1196 ± 4       | 1924 ± 8      |
| 304.25 | 1308 ± 7    | 788 ± 17    | 905 ± 13    | 834 ± 6     | 1215 ± 5       | 1950 ± 8      |
| 304.5  | 1318 ± 7    | 795 ± 17    | 915 ± 13    | 842 ± 6     | 1234 ± 5       | 1976 ± 8      |
| 304.75 | 1329 ± 7    | 802 ± 17    | 925 ± 14    | 850 ± 6     | 1254 ± 5       | 2002 ± 9      |
| 305.0  | 1340 ± 7    | 809 ± 17    | 935 ± 14    | 859 ± 6     | 1274 ± 5       | 2029 ± 9      |
| 305.25 | 1350 ± 7    | 816 ± 18    | 945 ± 14    | 867 ± 6     | 1294 ± 5       | 2056 ± 9      |
| 305.5  | 1361 ± 8    | 823 ± 18    | 955 ± 14    | 876 ± 6     | 1314 ± 5       | 2083 ± 9      |
| 305.75 | 1372 ± 8    | 830 ± 18    | 965 ± 15    | 884 ± 6     | 1335 ± 5       | 2111 ± 9      |
| 306.0  | 1383 ± 8    | 837 ± 19    | 975 ± 15    | 893 ± 6     | 1356 ± 5       | 2139 ± 10     |
| 306.25 | 1394 ± 8    | 844 ± 19    | 986 ± 15    | 902 ± 6     | 1377 ± 5       | 2168 ± 10     |
| 306.5  | 1405 ± 8    | 851 ± 19    | 996 ± 16    | 911 ± 7     | 1399 ± 6       | 2196 ± 10     |
| 306.75 | 1417 ± 8    | 858 ± 19    | 1007 ± 16   | 920 ± 7     | 1421 ± 6       | 2225 ± 10     |
| 307.0  | 1428 ± 8    | 866 ± 20    | 1017 ± 16   | 929 ± 7     | 1443 ± 6       | 2255 ± 10     |
| 307.25 | 1439 ± 8    | 873 ± 20    | 1028 ± 16   | 938 ± 7     | 1466 ± 6       | 2284 ± 11     |
| 307.5  | 1451 ± 8    | 880 ± 20    | 1039 ± 17   | 947 ± 7     | 1489 ± 6       | 2314 ± 11     |
| 307.75 | 1462 ± 9    | 888 ± 21    | 1050 ± 17   | 956 ± 7     | 1512 ± 6       | 2345 ± 11     |
| 308.0  | 1474 ± 9    | 895 ± 21    | 1061 ± 17   | 965 ± 7     | 1536 ± 6       | 2376 ± 11     |
| 308.25 | 1485 ± 9    | 903 ± 21    | 1072 ± 18   | 975 ± 7     | 1560 ± 7       | 2407 ± 12     |
| 308.5  | 1497 ± 9    | 910 ± 22    | 1084 ± 18   | 984 ± 7     | 1584 ± 7       | 2438 ± 12     |
| 308.75 | 1509 ± 9    | 918 ± 22    | 1095 ± 18   | 994 ± 8     | 1608 ± 7       | 2470 ± 12     |
| 309.0  | 1521 ± 9    | 926 ± 22    | 1107 ± 18   | 1003 ± 8    | 1633 ± 7       | 2502 ± 12     |
| 309.25 | 1533 ± 9    | 933 ± 23    | 1118 ± 19   | 1013 ± 8    | 1658 ± 7       | 2535 ± 12     |
| 309.5  | 1545 ± 10   | 941 ± 23    | 1130 ± 19   | 1023 ± 8    | 1684 ± 7       | 2568 ± 13     |
| 309.75 | 1557 ± 10   | 949 ± 23    | 1142 ± 19   | 1032 ± 8    | 1710 ± 8       | 2601 ± 13     |
| 310.0  | 1569 ± 10   | 957 ± 24    | 1154 ± 20   | 1042 ± 8    | 1736 ± 8       | 2635 ± 13     |

Table 3: Exchange rates extrapolated to 310 K, 1M glucose at pH=7.00, using restricted model, with partial assignment.

| T(K)   | C <sub>6</sub> | C <sub>3/4</sub> | C <sub>3/4</sub> | C <sub>2</sub> | C <sub>1,α</sub> | C <sub>1,β</sub> |
|--------|----------------|------------------|------------------|----------------|------------------|------------------|
| 260.0  | 175.02 ± 0.27  | 125.0 ± 0.5      | 110.6 ± 0.5      | 112.2 ± 0.4    | 140.8 ± 0.5      | 280.4 ± 0.9      |
| 260.25 | 177.39 ± 0.26  | 126.9 ± 0.5      | 112.7 ± 0.5      | 114.0 ± 0.4    | 144.1 ± 0.5      | 286.4 ± 0.9      |
| 260.5  | 179.79 ± 0.26  | 128.9 ± 0.5      | 114.8 ± 0.5      | 115.9 ± 0.4    | 147.4 ± 0.5      | 292.5 ± 0.9      |
| 260.75 | 182.21 ± 0.26  | 130.8 ± 0.5      | 116.9 ± 0.5      | 117.9 ± 0.4    | 150.9 ± 0.5      | 298.7 ± 0.9      |
| 261.0  | 184.67 ± 0.26  | 132.8 ± 0.5      | 119.2 ± 0.5      | 119.8 ± 0.4    | 154.4 ± 0.5      | 305.1 ± 0.9      |
| 261.25 | 187.15 ± 0.25  | 134.8 ± 0.5      | 121.4 ± 0.5      | 121.8 ± 0.4    | 157.9 ± 0.5      | 311.5 ± 0.9      |
| 261.5  | 189.66 ± 0.25  | 136.9 ± 0.5      | 123.7 ± 0.5      | 123.8 ± 0.4    | 161.6 ± 0.5      | 318.1 ± 0.9      |
| 261.75 | 192.20 ± 0.25  | 138.9 ± 0.5      | 126.0 ± 0.5      | 125.9 ± 0.4    | 165.3 ± 0.5      | 324.9 ± 0.9      |
| 262.0  | 194.77 ± 0.24  | 141.0 ± 0.5      | 128.3 ± 0.5      | 127.9 ± 0.4    | 169.1 ± 0.5      | 331.7 ± 0.8      |
| 262.25 | 197.37 ± 0.24  | 143.1 ± 0.5      | 130.7 ± 0.4      | 130.0 ± 0.4    | 173.0 ± 0.5      | 338.7 ± 0.8      |
| 262.5  | 199.99 ± 0.24  | 145.3 ± 0.5      | 133.2 ± 0.4      | 132.2 ± 0.4    | 176.9 ± 0.5      | 345.9 ± 0.8      |
| 262.75 | 202.65 ± 0.23  | 147.5 ± 0.5      | 135.6 ± 0.4      | 134.3 ± 0.4    | 181.0 ± 0.5      | 353.1 ± 0.8      |
| 263.0  | 205.34 ± 0.23  | 149.7 ± 0.4      | 138.2 ± 0.4      | 136.53 ± 0.35  | 185.1 ± 0.5      | 360.5 ± 0.8      |
| 263.25 | 208.06 ± 0.22  | 151.9 ± 0.4      | 140.7 ± 0.4      | 138.76 ± 0.35  | 189.3 ± 0.5      | 368.1 ± 0.8      |
| 263.5  | 210.81 ± 0.22  | 154.2 ± 0.4      | 143.3 ± 0.4      | 141.02 ± 0.34  | 193.6 ± 0.5      | 375.8 ± 0.8      |
| 263.75 | 213.59 ± 0.22  | 156.5 ± 0.4      | 146.0 ± 0.4      | 143.31 ± 0.33  | 198.0 ± 0.5      | 383.6 ± 0.8      |
| 264.0  | 216.40 ± 0.21  | 158.8 ± 0.4      | 148.7 ± 0.4      | 145.64 ± 0.33  | 202.5 ± 0.5      | 391.6 ± 0.8      |
| 264.25 | 219.25 ± 0.21  | 161.1 ± 0.4      | 151.4 ± 0.4      | 148.00 ± 0.32  | 207.1 ± 0.5      | 399.7 ± 0.8      |
| 264.5  | 222.12 ± 0.20  | 163.5 ± 0.4      | 154.2 ± 0.4      | 150.39 ± 0.31  | 211.8 ± 0.5      | 408.0 ± 0.8      |
| 264.75 | 225.03 ± 0.20  | 165.9 ± 0.4      | 157.0 ± 0.4      | 152.82 ± 0.31  | 216.5 ± 0.5      | 416.4 ± 0.7      |
| 265.0  | 227.98 ± 0.19  | 168.4 ± 0.4      | 159.86 ± 0.35    | 155.28 ± 0.30  | 221.4 ± 0.5      | 425.0 ± 0.7      |
| 265.25 | 230.95 ± 0.19  | 170.8 ± 0.4      | 162.77 ± 0.34    | 157.77 ± 0.29  | 226.4 ± 0.5      | 433.8 ± 0.7      |
| 265.5  | 233.96 ± 0.18  | 173.35 ± 0.35    | 165.74 ± 0.33    | 160.31 ± 0.29  | 231.4 ± 0.5      | 442.7 ± 0.7      |
| 265.75 | 237.00 ± 0.18  | 175.89 ± 0.34    | 168.75 ± 0.32    | 162.87 ± 0.28  | 236.6 ± 0.4      | 451.8 ± 0.7      |
| 266.0  | 240.08 ± 0.17  | 178.46 ± 0.33    | 171.81 ± 0.31    | 165.48 ± 0.27  | 241.9 ± 0.4      | 461.0 ± 0.7      |
| 266.25 | 243.19 ± 0.17  | 181.07 ± 0.31    | 174.92 ± 0.30    | 168.12 ± 0.26  | 247.3 ± 0.4      | 470.5 ± 0.7      |
| 266.5  | 246.33 ± 0.16  | 183.70 ± 0.30    | 178.09 ± 0.29    | 170.80 ± 0.26  | 252.8 ± 0.4      | 480.1 ± 0.7      |
| 266.75 | 249.51 ± 0.16  | 186.38 ± 0.29    | 181.30 ± 0.28    | 173.51 ± 0.25  | 258.4 ± 0.4      | 489.9 ± 0.6      |
| 267.0  | 252.72 ± 0.16  | 189.08 ± 0.28    | 184.57 ± 0.27    | 176.27 ± 0.24  | 264.1 ± 0.4      | 499.8 ± 0.6      |
| 267.25 | 255.97 ± 0.15  | 191.82 ± 0.27    | 187.88 ± 0.26    | 179.06 ± 0.24  | 269.9 ± 0.4      | 510.0 ± 0.6      |
| 267.5  | 259.26 ± 0.15  | 194.60 ± 0.26    | 191.26 ± 0.25    | 181.89 ± 0.23  | 275.9 ± 0.4      | 520.3 ± 0.6      |
| 267.75 | 262.58 ± 0.14  | 197.41 ± 0.25    | 194.68 ± 0.24    | 184.76 ± 0.22  | 282.0 ± 0.4      | 530.9 ± 0.6      |
| 268.0  | 265.94 ± 0.14  | 200.25 ± 0.25    | 198.16 ± 0.23    | 187.67 ± 0.22  | 288.2 ± 0.4      | 541.6 ± 0.6      |
| 268.25 | 269.34 ± 0.13  | 203.13 ± 0.24    | 201.70 ± 0.23    | 190.62 ± 0.21  | 294.5 ± 0.4      | 552.5 ± 0.6      |
| 268.5  | 272.77 ± 0.13  | 206.05 ± 0.23    | 205.29 ± 0.22    | 193.62 ± 0.21  | 300.93 ± 0.35    | 563.6 ± 0.6      |
| 268.75 | 276.24 ± 0.13  | 209.00 ± 0.23    | 208.94 ± 0.22    | 196.65 ± 0.20  | 307.51 ± 0.35    | 574.9 ± 0.6      |
| 269.0  | 279.75 ± 0.13  | 211.99 ± 0.23    | 212.65 ± 0.22    | 199.72 ± 0.20  | 314.22 ± 0.35    | 586.5 ± 0.5      |
| 269.25 | 283.29 ± 0.12  | 215.02 ± 0.23    | 216.42 ± 0.22    | 202.84 ± 0.20  | 321.07 ± 0.35    | 598.2 ± 0.5      |
| 269.5  | 286.88 ± 0.12  | 218.08 ± 0.23    | 220.24 ± 0.22    | 206.00 ± 0.20  | 328.05 ± 0.35    | 610.1 ± 0.5      |
| 269.75 | 290.50 ± 0.12  | 221.19 ± 0.23    | 224.13 ± 0.23    | 209.21 ± 0.20  | 335.16 ± 0.35    | 622.3 ± 0.5      |
| 270.0  | 294.16 ± 0.12  | 224.33 ± 0.24    | 228.08 ± 0.24    | 212.46 ± 0.21  | 342.43 ± 0.35    | 634.7 ± 0.5      |
| 270.25 | 297.86 ± 0.12  | 227.51 ± 0.25    | 232.09 ± 0.25    | 215.75 ± 0.21  | 349.8 ± 0.4      | 647.3 ± 0.6      |
| 270.5  | 301.60 ± 0.13  | 230.73 ± 0.26    | 236.17 ± 0.27    | 219.09 ± 0.22  | 357.4 ± 0.4      | 660.1 ± 0.6      |
| 270.75 | 305.39 ± 0.13  | 233.99 ± 0.27    | 240.31 ± 0.28    | 222.47 ± 0.23  | 365.1 ± 0.4      | 673.2 ± 0.6      |
| 271.0  | 309.21 ± 0.13  | 237.29 ± 0.29    | 244.51 ± 0.30    | 225.90 ± 0.24  | 372.9 ± 0.4      | 686.5 ± 0.6      |
| 271.25 | 313.07 ± 0.14  | 240.63 ± 0.30    | 248.78 ± 0.33    | 229.38 ± 0.25  | 380.9 ± 0.4      | 700.0 ± 0.6      |
| 271.5  | 316.98 ± 0.14  | 244.01 ± 0.32    | 253.11 ± 0.35    | 232.90 ± 0.26  | 389.1 ± 0.4      | 713.8 ± 0.7      |
| 271.75 | 320.92 ± 0.15  | 247.43 ± 0.34    | 257.5 ± 0.4      | 236.47 ± 0.27  | 397.4 ± 0.5      | 727.8 ± 0.7      |
| 272.0  | 324.91 ± 0.16  | 250.9 ± 0.4      | 262.0 ± 0.4      | 240.09 ± 0.29  | 405.9 ± 0.5      | 742.1 ± 0.7      |
| 272.25 | 328.94 ± 0.17  | 254.4 ± 0.4      | 266.5 ± 0.4      | 243.76 ± 0.31  | 414.5 ± 0.5      | 756.6 ± 0.8      |
| 272.5  | 333.02 ± 0.17  | 258.0 ± 0.4      | 271.1 ± 0.5      | 247.48 ± 0.33  | 423.4 ± 0.6      | 771.4 ± 0.8      |
| 272.75 | 337.13 ± 0.18  | 261.5 ± 0.4      | 275.8 ± 0.5      | 251.24 ± 0.34  | 432.4 ± 0.6      | 786.5 ± 0.9      |
| 273.0  | 341.29 ± 0.19  | 265.2 ± 0.5      | 280.6 ± 0.5      | 255.1 ± 0.4    | 441.5 ± 0.6      | 801.8 ± 0.9      |
| 273.25 | 345.50 ± 0.20  | 268.9 ± 0.5      | 285.4 ± 0.6      | 258.9 ± 0.4    | 450.9 ± 0.7      | 817.4 ± 1.0      |
| 273.5  | 349.74 ± 0.22  | 272.6 ± 0.5      | 290.3 ± 0.6      | 262.9 ± 0.4    | 460.4 ± 0.7      | 833.2 ± 1.1      |
| 273.75 | 354.04 ± 0.23  | 276.4 ± 0.6      | 295.3 ± 0.6      | 266.8 ± 0.4    | 470.1 ± 0.8      | 849.4 ± 1.1      |
| 274.0  | 358.38 ± 0.24  | 280.2 ± 0.6      | 300.3 ± 0.7      | 270.9 ± 0.5    | 480.0 ± 0.8      | 865.8 ± 1.2      |
| 274.25 | 362.76 ± 0.25  | 284.0 ± 0.6      | 305.5 ± 0.7      | 274.9 ± 0.5    | 490.1 ± 0.9      | 882.5 ± 1.3      |
| 274.5  | 367.19 ± 0.26  | 287.9 ± 0.7      | 310.7 ± 0.8      | 279.1 ± 0.5    | 500.3 ± 0.9      | 899.5 ± 1.3      |
| 274.75 | 371.66 ± 0.28  | 291.9 ± 0.7      | 316.0 ± 0.8      | 283.3 ± 0.5    | 510.8 ± 1.0      | 916.8 ± 1.4      |
| 275.0  | 376.18 ± 0.29  | 295.9 ± 0.7      | 321.4 ± 0.9      | 287.5 ± 0.6    | 521.5 ± 1.1      | 934.4 ± 1.5      |
| 275.25 | 380.75 ± 0.31  | 299.9 ± 0.8      | 326.8 ± 0.9      | 291.8 ± 0.6    | 532.3 ± 1.1      | 952.3 ± 1.6      |
| 275.5  | 385.37 ± 0.32  | 304.0 ± 0.8      | 332.3 ± 0.9      | 296.1 ± 0.6    | 543.4 ± 1.2      | 970.5 ± 1.7      |
| 275.75 | 390.03 ± 0.34  | 308.2 ± 0.8      | 338.0 ± 1.0      | 300.6 ± 0.7    | 554.7 ± 1.2      | 989.0 ± 1.8      |
| 276.0  | 394.75 ± 0.35  | 312.4 ± 0.9      | 343.7 ± 1.0      | 305.0 ± 0.7    | 566.2 ± 1.3      | 1007.9 ± 1.8     |
| 276.25 | 399.5 ± 0.4    | 316.6 ± 0.9      | 349.4 ± 1.1      | 309.6 ± 0.7    | 577.9 ± 1.4      | 1027.0 ± 1.9     |
| 276.5  | 404.3 ± 0.4    | 320.9 ± 1.0      | 355.3 ± 1.2      | 314.1 ± 0.8    | 589.9 ± 1.5      | 1046.5 ± 2.0     |
| 276.75 | 409.2 ± 0.4    | 325.3 ± 1.0      | 361.3 ± 1.2      | 318.8 ± 0.8    | 602.0 ± 1.5      | 1066.4 ± 2.1     |
| 277.0  | 414.1 ± 0.4    | 329.7 ± 1.1      | 367.3 ± 1.3      | 323.5 ± 0.8    | 614.4 ± 1.6      | 1086.6 ± 2.3     |
| 277.25 | 419.0 ± 0.4    | 334.1 ± 1.1      | 373.5 ± 1.3      | 328.3 ± 0.9    | 627.1 ± 1.7      | 1107.1 ± 2.4     |
| 277.5  | 424.1 ± 0.5    | 338.6 ± 1.1      | 379.7 ± 1.4      | 333.1 ± 0.9    | 639.9 ± 1.8      | 1128.0 ± 2.5     |
| 277.75 | 429.1 ± 0.5    | 343.1 ± 1.2      | 386.1 ± 1.4      | 338.0 ± 0.9    | 653.0 ± 1.9      | 1149.2 ± 2.6     |
| 278.0  | 434.2 ± 0.5    | 347.8 ± 1.2      | 392.5 ± 1.5      | 343.0 ± 1.0    | 666.4 ± 2.0      | 1170.8 ± 2.7     |
| 278.25 | 439.4 ± 0.5    | 352.4 ± 1.3      | 399.0 ± 1.6      | 348.0 ± 1.0    | 680.0 ± 2.1      | 1192.7 ± 2.8     |
| 278.5  | 444.6 ± 0.5    | 357.1 ± 1.3      | 405.6 ± 1.6      | 353.1 ± 1.1    | 693.9 ± 2.2      | 1215.1 ± 3.0     |
| 278.75 | 449.9 ± 0.6    | 361.9 ± 1.4      | 412.3 ± 1.7      | 358.2 ± 1.1    | 708.0 ± 2.3      | 1237.8 ± 3.1     |
| 279.0  | 455.2 ± 0.6    | 366.7 ± 1.4      | 419.1 ± 1.8      | 363.4 ± 1.1    | 722.3 ± 2.4      | 1260.9 ± 3.2     |
| 279.25 | 460.6 ± 0.6    | 371.6 ± 1.5      | 426.0 ± 1.9      | 368.7 ± 1.2    | 737.0 ± 2.5      | 1284.3 ± 3.4     |
| 279.5  | 466.0 ± 0.6    | 376.5 ± 1.6      | 433.1 ± 1.9      | 374.1 ± 1.2    | 751.9 ± 2.6      | 1308.2 ± 3.5     |
| 279.75 | 471.5 ± 0.6    | 381.5 ± 1.6      | 440.2 ± 2.0      | 379.5 ± 1.3    | 767.1 ± 2.7      | 1332 ± 4         |
| 280.0  | 477.0 ± 0.7    | 386.6 ± 1.7      | 447.4 ± 2.1      | 385.0 ± 1.3    | 782.5 ± 2.8      | 1357 ± 4         |
| 280.25 | 482.6 ± 0.7    | 391.7 ± 1.7      | 454.7 ± 2.2      | 390.5 ± 1.4    | 798.3 ± 2.9      | 1382 ± 4         |
| 280.5  | 488.3 ± 0.7    | 396.8 ± 1.8      | 462.2 ± 2.2      | 396.2 ± 1.4    | 814.3 ± 3.0      | 1408 ± 4         |
| 280.75 | 494.0 ± 0.7    | 402.1 ± 1.9      | 469.7 ± 2.3      | 401.9 ± 1.5    | 830.6 ± 3.2      | 1434 ± 4         |
| 281.0  | 499.7 ± 0.8    | 407.3 ± 1.9      | 477.4 ± 2.4      | 407.6 ± 1.5    | 847.3 ± 3.3      | 1460 ± 4         |
| 281.25 | 505.6 ± 0.8    | 412.7 ± 2.0      | 485.1 ± 2.5      | 413.5 ± 1.6    | 864.2 ± 3.4      | 1487 ± 5         |
| 281.5  | 511.4 ± 0.8    | 418.1 ± 2.0      | 493.0 ± 2.6      | 419.4 ± 1.6    | 881 ± 4          | 1514 ± 5         |
| 281.75 | 517.4 ± 0.8    | 423.6 ± 2.1      | 501.0 ± 2.7      | 425.4 ± 1.7    | 899 ± 4          | 1542 ± 5         |
| 282.0  | 523.4 ± 0.9    | 429.1 ± 2.2      | 509.1 ± 2.8      | 431.5 ± 1.8    | 917 ± 4          | 1570 ± 5         |
| 282.25 | 529.4 ± 0.9    | 434.7 ± 2.2      | 517.3 ± 2.9      | 437.6 ± 1.8    | 935 ± 4          | 1599 ± 5         |
| 282.5  | 535.5 ± 0.9    | 440.3 ± 2.3      | 525.6 ± 3.0      | 443.8 ± 1.9    | 954 ± 4          | 1628 ± 6         |
| 282.75 | 541.7 ± 0.9    | 446.0 ± 2.4      | 534.1 ± 3.1      | 450.1 ± 1.9    | 972 ± 4          | 1657 ± 6         |
| 283.0  | 548.0 ± 1.0    | 451.8 ± 2.5      | 542.7 ± 3.2      | 456.5 ± 2.0    | 992 ± 4          | 1687 ± 6         |
| 283.25 | 554.3 ± 1.0    | 457.7 ± 2.5      | 551.4 ± 3.3      | 462.9 ± 2.1    | 1011 ± 5         | 1718 ± 6         |
| 283.5  | 560.6 ± 1.0    | 463.6 ± 2.6      | 560.2 ± 3.4      | 469.5 ± 2.1    | 1031 ± 5         | 1749 ± 6         |
| 283.75 | 567.0 ± 1.0    | 469.6 ± 2.7      | 569.2 ± 3.5      | 476.1 ± 2.2    | 1051 ± 5         | 1781 ± 7         |
| 284.0  | 573.5 ± 1.1    | 475.6 ± 2.8      | 578 ± 4          | 482.8 ± 2.3    | 1072 ± 5         | 1813 ± 7         |
| 284.25 | 580.1 ± 1.1    | 481.7 ± 2.8      | 587 ± 4          | 489.6 ± 2.3    | 1093 ± 5         | 1845 ± 7         |
| 284.5  | 586.7 ± 1.1    | 487.9 ± 2.9      | 597 ± 4          | 496.4 ± 2.4    | 1114 ± 6         | 1878 ± 7         |
| 284.75 | 593.3 ± 1.2    | 494.2 ± 3.0      | 606 ± 4          | 503.4 ± 2.5    | 1136 ± 6         | 1912 ± 8         |
| 285.0  | 600.1 ± 1.2    | 500.5 ± 3.1      | 616 ± 4          | 510.4 ± 2.5    | 1158 ± 6         | 1946 ± 8         |



Table 4: CONT: Exchange rates extrapolated to 310 K, 1M glucose at pH=7.00, using restricted model, with partial assignment.

| T(K)   | $C_6$        | $C_{3/4}$   | $C_{3/4}$                     | $C_2$       | $C_{1,\alpha}$                | $C_{1,\beta}$                 |
|--------|--------------|-------------|-------------------------------|-------------|-------------------------------|-------------------------------|
| 285.25 | 606.9 ± 1.2  | 506.9 ± 3.2 | 626 ± 4                       | 517.5 ± 2.6 | 1181 ± 6                      | 1981 ± 8                      |
| 285.5  | 613.7 ± 1.3  | 513.3 ± 3.3 | 636 ± 4                       | 524.7 ± 2.7 | 1203 ± 6                      | 2016 ± 8                      |
| 285.75 | 620.7 ± 1.3  | 519.8 ± 3.4 | 646 ± 4                       | 532.0 ± 2.8 | 1227 ± 7                      | 2052 ± 9                      |
| 286.0  | 627.7 ± 1.3  | 526.4 ± 3.4 | 656 ± 5                       | 539.4 ± 2.8 | 1250 ± 7                      | 2089 ± 9                      |
| 286.25 | 634.7 ± 1.4  | 533.1 ± 3.5 | 666 ± 5                       | 546.9 ± 2.9 | 1275 ± 7                      | 2126 ± 9                      |
| 286.5  | 641.9 ± 1.4  | 540 ± 4     | 676 ± 5                       | 554.5 ± 3.0 | 1299 ± 7                      | 2163 ± 10                     |
| 286.75 | 649.1 ± 1.4  | 547 ± 4     | 687 ± 5                       | 562.1 ± 3.1 | 1324 ± 8                      | 2202 ± 10                     |
| 287.0  | 656.3 ± 1.5  | 554 ± 4     | 698 ± 5                       | 569.9 ± 3.2 | 1350 ± 8                      | 2240 ± 10                     |
| 287.25 | 663.7 ± 1.5  | 561 ± 4     | 709 ± 5                       | 577.7 ± 3.3 | 1375 ± 8                      | 2280 ± 11                     |
| 287.5  | 671.1 ± 1.5  | 568 ± 4     | 720 ± 5                       | 585.6 ± 3.3 | 1402 ± 8                      | 2320 ± 11                     |
| 287.75 | 678.6 ± 1.6  | 575 ± 4     | 731 ± 6                       | 593.7 ± 3.4 | 1429 ± 9                      | 2361 ± 11                     |
| 288.0  | 686.1 ± 1.6  | 582 ± 4     | 742 ± 6                       | 601.8 ± 3.5 | 1456 ± 9                      | 2402 ± 12                     |
| 288.25 | 693.7 ± 1.7  | 589 ± 4     | 754 ± 6                       | 610 ± 4     | 1483 ± 9                      | 2444 ± 12                     |
| 288.5  | 701.4 ± 1.7  | 597 ± 4     | 765 ± 6                       | 618 ± 4     | 1512 ± 9                      | 2487 ± 12                     |
| 288.75 | 709.2 ± 1.7  | 604 ± 5     | 777 ± 6                       | 627 ± 4     | 1540 ± 10                     | 2530 ± 13                     |
| 289.0  | 717.0 ± 1.8  | 612 ± 5     | 789 ± 6                       | 635 ± 4     | 1570 ± 10                     | 2574 ± 13                     |
| 289.25 | 725.0 ± 1.8  | 619 ± 5     | 801 ± 7                       | 644 ± 4     | 1599 ± 10                     | 2619 ± 13                     |
| 289.5  | 732.9 ± 1.9  | 627 ± 5     | 814 ± 7                       | 653 ± 4     | 1629 ± 11                     | 2664 ± 14                     |
| 289.75 | 741.0 ± 1.9  | 635 ± 5     | 826 ± 7                       | 661 ± 4     | 1660 ± 11                     | 2710 ± 14                     |
| 290.0  | 749.1 ± 1.9  | 642 ± 5     | 839 ± 7                       | 670 ± 4     | 1691 ± 11                     | 2757 ± 15                     |
| 290.25 | 757.3 ± 2.0  | 650 ± 5     | 852 ± 7                       | 679 ± 4     | 1723 ± 12                     | 2805 ± 15                     |
| 290.5  | 765.6 ± 2.0  | 658 ± 5     | 865 ± 8                       | 689 ± 5     | 1755 ± 12                     | 2853 ± 16                     |
| 290.75 | 774.0 ± 2.1  | 666 ± 5     | 878 ± 8                       | 698 ± 5     | 1788 ± 12                     | 2902 ± 16                     |
| 291.0  | 782.4 ± 2.1  | 675 ± 6     | 891 ± 8                       | 707 ± 5     | 1822 ± 13                     | 2952 ± 16                     |
| 291.25 | 791.0 ± 2.2  | 683 ± 6     | 905 ± 8                       | 717 ± 5     | 1856 ± 13                     | 3003 ± 17                     |
| 291.5  | 799.6 ± 2.2  | 691 ± 6     | 918 ± 8                       | 726 ± 5     | 1890 ± 14                     | 3054 ± 17                     |
| 291.75 | 808.2 ± 2.3  | 700 ± 6     | 932 ± 9                       | 736 ± 5     | 1925 ± 14                     | 3106 ± 18                     |
| 292.0  | 817.0 ± 2.3  | 708 ± 6     | 946 ± 9                       | 746 ± 5     | 1961 ± 14                     | 3159 ± 18                     |
| 292.25 | 825.8 ± 2.4  | 717 ± 6     | 961 ± 9                       | 756 ± 5     | 1997 ± 15                     | 3213 ± 19                     |
| 292.5  | 834.7 ± 2.4  | 726 ± 6     | 975 ± 9                       | 766 ± 5     | 2034 ± 15                     | 3268 ± 19                     |
| 292.75 | 843.7 ± 2.5  | 734 ± 7     | 990 ± 10                      | 776 ± 6     | 2072 ± 16                     | 3323 ± 20                     |
| 293.0  | 852.8 ± 2.5  | 743 ± 7     | 1005 ± 10                     | 786 ± 6     | 2110 ± 16                     | 3379 ± 20                     |
| 293.25 | 862.0 ± 2.6  | 752 ± 7     | 1020 ± 10                     | 797 ± 6     | 2149 ± 17                     | 3437 ± 21                     |
| 293.5  | 871.2 ± 2.6  | 761 ± 7     | 1035 ± 10                     | 807 ± 6     | 2188 ± 17                     | 3495 ± 22                     |
| 293.75 | 880.6 ± 2.7  | 770 ± 7     | 1050 ± 10                     | 818 ± 6     | 2228 ± 18                     | 3553 ± 22                     |
| 294.0  | 890.0 ± 2.7  | 780 ± 7     | 1066 ± 11                     | 828 ± 6     | 2269 ± 18                     | 3613 ± 23                     |
| 294.25 | 899.5 ± 2.8  | 789 ± 7     | 1082 ± 11                     | 839 ± 6     | 2311 ± 18                     | 3674 ± 23                     |
| 294.5  | 909.1 ± 2.8  | 799 ± 8     | 1098 ± 11                     | 850 ± 7     | 2353 ± 19                     | 3736 ± 24                     |
| 294.75 | 918.7 ± 2.9  | 808 ± 8     | 1114 ± 12                     | 861 ± 7     | 2396 ± 20                     | 3798 ± 25                     |
| 295.0  | 928.5 ± 3.0  | 818 ± 8     | 1131 ± 12                     | 873 ± 7     | 2439 ± 20                     | 3862 ± 25                     |
| 295.25 | 938.3 ± 3.0  | 828 ± 8     | 1148 ± 12                     | 884 ± 7     | 2484 ± 21                     | 3926 ± 26                     |
| 295.5  | 948.3 ± 3.1  | 837 ± 8     | 1164 ± 12                     | 896 ± 7     | 2529 ± 21                     | 3991 ± 27                     |
| 295.75 | 958.3 ± 3.1  | 847 ± 8     | 1182 ± 13                     | 907 ± 7     | 2574 ± 22                     | 4058 ± 27                     |
| 296.0  | 968.4 ± 3.2  | 857 ± 9     | 1199 ± 13                     | 919 ± 7     | 2621 ± 22                     | 4125 ± 28                     |
| 296.25 | 978.6 ± 3.3  | 868 ± 9     | 1217 ± 13                     | 931 ± 8     | 2668 ± 23                     | 4194 ± 29                     |
| 296.5  | 988.9 ± 3.3  | 878 ± 9     | 1234 ± 14                     | 943 ± 8     | 2716 ± 24                     | 4263 ± 29                     |
| 296.75 | 999.3 ± 3.4  | 888 ± 9     | 1253 ± 14                     | 955 ± 8     | 2765 ± 24                     | 4333 ± 30                     |
| 297.0  | 1009.8 ± 3.4 | 899 ± 9     | 1271 ± 14                     | 967 ± 8     | 2815 ± 25                     | 4405 ± 31                     |
| 297.25 | 1020.3 ± 3.5 | 909 ± 10    | 1289 ± 15                     | 980 ± 8     | 2865 ± 25                     | 4477 ± 32                     |
| 297.5  | 1031 ± 4     | 920 ± 10    | 1308 ± 15                     | 992 ± 8     | 2916 ± 26                     | 4551 ± 32                     |
| 297.75 | 1042 ± 4     | 931 ± 10    | 1327 ± 15                     | 1005 ± 9    | 2968 ± 27                     | 4626 ± 33                     |
| 298.0  | 1053 ± 4     | 942 ± 10    | 1346 ± 16                     | 1018 ± 9    | 3021 ± 28                     | 4702 ± 34                     |
| 298.25 | 1064 ± 4     | 953 ± 10    | 1366 ± 16                     | 1031 ± 9    | 3075 ± 28                     | 4778 ± 35                     |
| 298.5  | 1075 ± 4     | 964 ± 11    | 1386 ± 16                     | 1044 ± 9    | 3130 ± 29                     | $(4.86 \pm 0.04) \times 10^3$ |
| 298.75 | 1086 ± 4     | 975 ± 11    | 1406 ± 17                     | 1058 ± 9    | 3185 ± 30                     | $(4.94 \pm 0.04) \times 10^3$ |
| 299.0  | 1097 ± 4     | 987 ± 11    | 1426 ± 17                     | 1071 ± 10   | 3242 ± 30                     | $(5.02 \pm 0.04) \times 10^3$ |
| 299.25 | 1108 ± 4     | 998 ± 11    | 1447 ± 17                     | 1085 ± 10   | 3299 ± 31                     | $(5.10 \pm 0.04) \times 10^3$ |
| 299.5  | 1120 ± 4     | 1010 ± 11   | 1467 ± 18                     | 1098 ± 10   | 3357 ± 32                     | $(5.18 \pm 0.04) \times 10^3$ |
| 299.75 | 1131 ± 4     | 1021 ± 12   | 1488 ± 18                     | 1112 ± 10   | 3416 ± 33                     | $(5.26 \pm 0.04) \times 10^3$ |
| 300.0  | 1143 ± 4     | 1033 ± 12   | 1510 ± 18                     | 1126 ± 10   | 3476 ± 34                     | $(5.35 \pm 0.04) \times 10^3$ |
| 300.25 | 1155 ± 4     | 1045 ± 12   | 1531 ± 19                     | 1141 ± 11   | 3537 ± 35                     | $(5.44 \pm 0.04) \times 10^3$ |
| 300.5  | 1166 ± 4     | 1057 ± 12   | 1553 ± 19                     | 1155 ± 11   | 3599 ± 35                     | $(5.52 \pm 0.04) \times 10^3$ |
| 300.75 | 1178 ± 5     | 1069 ± 13   | 1575 ± 20                     | 1169 ± 11   | $(3.66 \pm 0.04) \times 10^3$ | $(5.61 \pm 0.04) \times 10^3$ |
| 301.0  | 1190 ± 5     | 1082 ± 13   | 1598 ± 20                     | 1184 ± 11   | $(3.73 \pm 0.04) \times 10^3$ | $(5.70 \pm 0.05) \times 10^3$ |
| 301.25 | 1203 ± 5     | 1094 ± 13   | 1621 ± 21                     | 1199 ± 11   | $(3.79 \pm 0.04) \times 10^3$ | $(5.79 \pm 0.05) \times 10^3$ |
| 301.5  | 1215 ± 5     | 1107 ± 13   | 1644 ± 21                     | 1214 ± 12   | $(3.86 \pm 0.04) \times 10^3$ | $(5.89 \pm 0.05) \times 10^3$ |
| 301.75 | 1227 ± 5     | 1119 ± 13   | 1667 ± 21                     | 1229 ± 12   | $(3.92 \pm 0.04) \times 10^3$ | $(5.98 \pm 0.05) \times 10^3$ |
| 302.0  | 1240 ± 5     | 1132 ± 14   | 1690 ± 22                     | 1245 ± 12   | $(3.99 \pm 0.04) \times 10^3$ | $(6.08 \pm 0.05) \times 10^3$ |
| 302.25 | 1252 ± 5     | 1145 ± 14   | 1714 ± 22                     | 1260 ± 12   | $(4.06 \pm 0.04) \times 10^3$ | $(6.17 \pm 0.05) \times 10^3$ |
| 302.5  | 1265 ± 5     | 1158 ± 14   | 1738 ± 23                     | 1276 ± 13   | $(4.13 \pm 0.04) \times 10^3$ | $(6.27 \pm 0.05) \times 10^3$ |
| 302.75 | 1278 ± 5     | 1171 ± 14   | 1763 ± 23                     | 1292 ± 13   | $(4.20 \pm 0.04) \times 10^3$ | $(6.37 \pm 0.05) \times 10^3$ |
| 303.0  | 1291 ± 5     | 1184 ± 15   | 1788 ± 24                     | 1308 ± 13   | $(4.28 \pm 0.05) \times 10^3$ | $(6.47 \pm 0.05) \times 10^3$ |
| 303.25 | 1304 ± 5     | 1198 ± 15   | 1813 ± 24                     | 1324 ± 13   | $(4.35 \pm 0.05) \times 10^3$ | $(6.57 \pm 0.06) \times 10^3$ |
| 303.5  | 1317 ± 5     | 1211 ± 15   | 1838 ± 25                     | 1340 ± 14   | $(4.42 \pm 0.05) \times 10^3$ | $(6.68 \pm 0.06) \times 10^3$ |
| 303.75 | 1330 ± 6     | 1225 ± 16   | 1864 ± 25                     | 1357 ± 14   | $(4.50 \pm 0.05) \times 10^3$ | $(6.78 \pm 0.06) \times 10^3$ |
| 304.0  | 1343 ± 6     | 1239 ± 16   | 1890 ± 26                     | 1373 ± 14   | $(4.58 \pm 0.05) \times 10^3$ | $(6.89 \pm 0.06) \times 10^3$ |
| 304.25 | 1357 ± 6     | 1253 ± 16   | 1916 ± 26                     | 1390 ± 14   | $(4.66 \pm 0.05) \times 10^3$ | $(7.00 \pm 0.06) \times 10^3$ |
| 304.5  | 1370 ± 6     | 1267 ± 16   | 1943 ± 27                     | 1407 ± 15   | $(4.74 \pm 0.05) \times 10^3$ | $(7.11 \pm 0.06) \times 10^3$ |
| 304.75 | 1384 ± 6     | 1281 ± 17   | 1970 ± 27                     | 1425 ± 15   | $(4.82 \pm 0.05) \times 10^3$ | $(7.22 \pm 0.06) \times 10^3$ |
| 305.0  | 1398 ± 6     | 1296 ± 17   | 1997 ± 28                     | 1442 ± 15   | $(4.90 \pm 0.05) \times 10^3$ | $(7.33 \pm 0.06) \times 10^3$ |
| 305.25 | 1412 ± 6     | 1310 ± 17   | 2025 ± 29                     | 1460 ± 16   | $(4.98 \pm 0.06) \times 10^3$ | $(7.45 \pm 0.07) \times 10^3$ |
| 305.5  | 1426 ± 6     | 1325 ± 18   | 2053 ± 29                     | 1477 ± 16   | $(5.07 \pm 0.06) \times 10^3$ | $(7.56 \pm 0.07) \times 10^3$ |
| 305.75 | 1440 ± 6     | 1339 ± 18   | 2081 ± 30                     | 1495 ± 16   | $(5.15 \pm 0.06) \times 10^3$ | $(7.68 \pm 0.07) \times 10^3$ |
| 306.0  | 1454 ± 6     | 1354 ± 18   | 2110 ± 30                     | 1514 ± 16   | $(5.24 \pm 0.06) \times 10^3$ | $(7.80 \pm 0.07) \times 10^3$ |
| 306.25 | 1468 ± 7     | 1369 ± 18   | 2139 ± 31                     | 1532 ± 17   | $(5.33 \pm 0.06) \times 10^3$ | $(7.92 \pm 0.07) \times 10^3$ |
| 306.5  | 1483 ± 7     | 1385 ± 19   | 2169 ± 31                     | 1551 ± 17   | $(5.42 \pm 0.06) \times 10^3$ | $(8.05 \pm 0.07) \times 10^3$ |
| 306.75 | 1497 ± 7     | 1400 ± 19   | 2198 ± 32                     | 1569 ± 17   | $(5.51 \pm 0.06) \times 10^3$ | $(8.17 \pm 0.08) \times 10^3$ |
| 307.0  | 1512 ± 7     | 1415 ± 19   | 2228 ± 33                     | 1588 ± 18   | $(5.60 \pm 0.07) \times 10^3$ | $(8.30 \pm 0.08) \times 10^3$ |
| 307.25 | 1527 ± 7     | 1431 ± 20   | 2259 ± 33                     | 1608 ± 18   | $(5.70 \pm 0.07) \times 10^3$ | $(8.42 \pm 0.08) \times 10^3$ |
| 307.5  | 1542 ± 7     | 1447 ± 20   | 2290 ± 34                     | 1627 ± 18   | $(5.79 \pm 0.07) \times 10^3$ | $(8.55 \pm 0.08) \times 10^3$ |
| 307.75 | 1557 ± 7     | 1463 ± 20   | 2321 ± 35                     | 1646 ± 19   | $(5.89 \pm 0.07) \times 10^3$ | $(8.69 \pm 0.08) \times 10^3$ |
| 308.0  | 1572 ± 7     | 1479 ± 21   | 2353 ± 35                     | 1666 ± 19   | $(5.99 \pm 0.07) \times 10^3$ | $(8.82 \pm 0.08) \times 10^3$ |
| 308.25 | 1588 ± 7     | 1495 ± 21   | $(2.38 \pm 0.04) \times 10^3$ | 1686 ± 19   | $(6.09 \pm 0.07) \times 10^3$ | $(8.95 \pm 0.09) \times 10^3$ |
| 308.5  | 1603 ± 7     | 1512 ± 21   | $(2.42 \pm 0.04) \times 10^3$ | 1706 ± 20   | $(6.19 \pm 0.07) \times 10^3$ | $(9.09 \pm 0.09) \times 10^3$ |
| 308.75 | 1619 ± 8     | 1528 ± 22   | $(2.45 \pm 0.04) \times 10^3$ | 1727 ± 20   | $(6.29 \pm 0.08) \times 10^3$ | $(9.23 \pm 0.09) \times 10^3$ |
| 309.0  | 1634 ± 8     | 1545 ± 22   | $(2.48 \pm 0.04) \times 10^3$ | 1747 ± 20   | $(6.39 \pm 0.08) \times 10^3$ | $(9.37 \pm 0.09) \times 10^3$ |
| 309.25 | 1650 ± 8     | 1562 ± 23   | $(2.52 \pm 0.04) \times 10^3$ | 1768 ± 21   | $(6.50 \pm 0.08) \times 10^3$ | $(9.51 \pm 0.09) \times 10^3$ |
| 309.5  | 1666 ± 8     | 1579 ± 23   | $(2.55 \pm 0.04) \times 10^3$ | 1789 ± 21   | $(6.61 \pm 0.08) \times 10^3$ | $(9.66 \pm 0.09) \times 10^3$ |
| 309.75 | 1682 ± 8     | 1596 ± 23   | $(2.58 \pm 0.04) \times 10^3$ | 1811 ± 21   | $(6.72 \pm 0.08) \times 10^3$ | $(9.81 \pm 0.10) \times 10^3$ |
| 310.0  | 1699 ± 8     | 1613 ± 24   | $(2.62 \pm 0.04) \times 10^3$ | 1832 ± 22   | $(6.83 \pm 0.09) \times 10^3$ | $(9.95 \pm 0.10) \times 10^3$ |

Table 5: Exchange rates extrapolated to 310 K, 1M glucose at pH=7.38, using restricted model, with partial assignment.

| T(K)   | $C_6$         | $C_{3/4}$                     | $C_{3/4}$   | $C_2$                         | $C_{1,\alpha}$                | $C_{1,\beta}$                 |
|--------|---------------|-------------------------------|-------------|-------------------------------|-------------------------------|-------------------------------|
| 260.0  | 162.0 ± 0.7   | 111.0 ± 2.2                   | 176.4 ± 2.1 | 99.7 ± 1.3                    | 222.3 ± 3.0                   | 478 ± 6                       |
| 260.25 | 165.5 ± 0.7   | 114.5 ± 2.2                   | 179.5 ± 2.1 | 103.0 ± 1.3                   | 229.1 ± 3.0                   | 490 ± 6                       |
| 260.5  | 169.0 ± 0.7   | 118.2 ± 2.2                   | 182.6 ± 2.0 | 106.3 ± 1.3                   | 236.1 ± 3.0                   | 501 ± 6                       |
| 260.75 | 172.6 ± 0.7   | 121.9 ± 2.2                   | 185.8 ± 2.0 | 109.8 ± 1.3                   | 243.3 ± 3.0                   | 514 ± 6                       |
| 261.0  | 176.3 ± 0.7   | 125.8 ± 2.2                   | 189.0 ± 2.0 | 113.3 ± 1.3                   | 250.6 ± 3.0                   | 526 ± 6                       |
| 261.25 | 180.1 ± 0.7   | 129.7 ± 2.2                   | 192.3 ± 2.0 | 117.0 ± 1.3                   | 258.2 ± 3.0                   | 539 ± 6                       |
| 261.5  | 183.9 ± 0.7   | 133.8 ± 2.2                   | 195.6 ± 2.0 | 120.8 ± 1.3                   | 266.0 ± 3.0                   | 552 ± 6                       |
| 261.75 | 187.8 ± 0.7   | 138.0 ± 2.2                   | 199.0 ± 2.0 | 124.7 ± 1.3                   | 274.0 ± 3.0                   | 566 ± 6                       |
| 262.0  | 191.7 ± 0.7   | 142.3 ± 2.2                   | 202.4 ± 1.9 | 128.7 ± 1.3                   | 282.3 ± 3.0                   | 579 ± 6                       |
| 262.25 | 195.8 ± 0.7   | 146.8 ± 2.2                   | 205.9 ± 1.9 | 132.8 ± 1.3                   | 290.8 ± 3.0                   | 593 ± 6                       |
| 262.5  | 199.9 ± 0.7   | 151.4 ± 2.2                   | 209.4 ± 1.9 | 137.1 ± 1.3                   | 299.5 ± 3.0                   | 607 ± 6                       |
| 262.75 | 204.1 ± 0.7   | 156.1 ± 2.2                   | 213.0 ± 1.9 | 141.4 ± 1.3                   | 308.4 ± 3.0                   | 622 ± 6                       |
| 263.0  | 208.4 ± 0.6   | 161.0 ± 2.1                   | 216.6 ± 1.8 | 146.0 ± 1.3                   | 317.6 ± 3.0                   | 637 ± 6                       |
| 263.25 | 212.7 ± 0.6   | 166.0 ± 2.1                   | 220.3 ± 1.8 | 150.6 ± 1.3                   | 327.1 ± 3.0                   | 652 ± 6                       |
| 263.5  | 217.2 ± 0.6   | 171.1 ± 2.1                   | 224.1 ± 1.8 | 155.4 ± 1.2                   | 336.8 ± 2.9                   | 668 ± 6                       |
| 263.75 | 221.7 ± 0.6   | 176.4 ± 2.1                   | 227.9 ± 1.7 | 160.3 ± 1.2                   | 346.8 ± 2.9                   | 684 ± 6                       |
| 264.0  | 226.3 ± 0.6   | 181.9 ± 2.0                   | 231.8 ± 1.7 | 165.4 ± 1.2                   | 357.1 ± 2.9                   | 700 ± 6                       |
| 264.25 | 231.0 ± 0.6   | 187.5 ± 2.0                   | 235.7 ± 1.7 | 170.6 ± 1.2                   | 367.7 ± 2.8                   | 717 ± 6                       |
| 264.5  | 235.8 ± 0.6   | 193.2 ± 2.0                   | 239.7 ± 1.6 | 176.0 ± 1.1                   | 378.5 ± 2.8                   | 734 ± 6                       |
| 264.75 | 240.7 ± 0.5   | 199.2 ± 1.9                   | 243.7 ± 1.6 | 181.6 ± 1.1                   | 389.7 ± 2.8                   | 751 ± 6                       |
| 265.0  | 245.7 ± 0.5   | 205.3 ± 1.9                   | 247.8 ± 1.6 | 187.3 ± 1.1                   | 401.1 ± 2.7                   | 769 ± 6                       |
| 265.25 | 250.7 ± 0.5   | 211.6 ± 1.8                   | 252.0 ± 1.5 | 193.1 ± 1.1                   | 412.9 ± 2.7                   | 787 ± 6                       |
| 265.5  | 255.9 ± 0.5   | 218.0 ± 1.8                   | 256.2 ± 1.5 | 199.2 ± 1.0                   | 425.0 ± 2.6                   | 806 ± 6                       |
| 265.75 | 261.2 ± 0.5   | 224.7 ± 1.7                   | 260.5 ± 1.5 | 205.4 ± 1.0                   | 437.4 ± 2.5                   | 824 ± 6                       |
| 266.0  | 266.5 ± 0.5   | 231.5 ± 1.7                   | 264.9 ± 1.4 | 211.8 ± 0.9                   | 450.2 ± 2.5                   | 844 ± 5                       |
| 266.25 | 272.0 ± 0.4   | 238.6 ± 1.6                   | 269.3 ± 1.4 | 218.4 ± 0.9                   | 463.3 ± 2.4                   | 864 ± 5                       |
| 266.5  | 277.5 ± 0.4   | 245.8 ± 1.6                   | 273.8 ± 1.3 | 225.2 ± 0.9                   | 476.8 ± 2.4                   | 884 ± 5                       |
| 266.75 | 283.2 ± 0.4   | 253.2 ± 1.5                   | 278.3 ± 1.3 | 232.2 ± 0.8                   | 490.6 ± 2.3                   | 904 ± 5                       |
| 267.0  | 289.0 ± 0.4   | 260.9 ± 1.5                   | 282.9 ± 1.3 | 239.4 ± 0.8                   | 504.8 ± 2.2                   | 925 ± 5                       |
| 267.25 | 294.8 ± 0.4   | 268.8 ± 1.4                   | 287.6 ± 1.2 | 246.8 ± 0.7                   | 519.4 ± 2.2                   | 947 ± 5                       |
| 267.5  | 300.8 ± 0.4   | 276.8 ± 1.3                   | 292.4 ± 1.2 | 254.4 ± 0.7                   | 534.4 ± 2.1                   | 969 ± 5                       |
| 267.75 | 306.89 ± 0.35 | 285.2 ± 1.3                   | 297.2 ± 1.1 | 262.2 ± 0.7                   | 549.8 ± 2.0                   | 991 ± 5                       |
| 268.0  | 313.09 ± 0.34 | 293.7 ± 1.3                   | 302.1 ± 1.1 | 270.3 ± 0.6                   | 565.6 ± 2.0                   | 1014 ± 5                      |
| 268.25 | 319.40 ± 0.33 | 302.5 ± 1.2                   | 307.1 ± 1.1 | 278.6 ± 0.6                   | 581.9 ± 1.9                   | 1038 ± 4                      |
| 268.5  | 325.83 ± 0.32 | 311.5 ± 1.2                   | 312.1 ± 1.0 | 287.1 ± 0.6                   | 598.5 ± 1.9                   | 1062 ± 4                      |
| 268.75 | 332.38 ± 0.32 | 320.8 ± 1.2                   | 317.2 ± 1.0 | 295.9 ± 0.6                   | 615.6 ± 1.9                   | 1086 ± 4                      |
| 269.0  | 339.04 ± 0.32 | 330.4 ± 1.3                   | 322.4 ± 1.0 | 304.9 ± 0.7                   | 633.2 ± 1.9                   | 1111 ± 4                      |
| 269.25 | 345.83 ± 0.33 | 340.2 ± 1.3                   | 327.7 ± 1.0 | 314.2 ± 0.7                   | 651.2 ± 2.0                   | 1136 ± 4                      |
| 269.5  | 352.74 ± 0.34 | 350.3 ± 1.4                   | 333.0 ± 1.0 | 323.7 ± 0.8                   | 669.8 ± 2.0                   | 1162 ± 4                      |
| 269.75 | 359.8 ± 0.4   | 360.7 ± 1.5                   | 338.5 ± 1.0 | 333.5 ± 0.9                   | 688.8 ± 2.1                   | 1189 ± 4                      |
| 270.0  | 366.9 ± 0.4   | 371.3 ± 1.7                   | 344.0 ± 1.0 | 343.6 ± 1.0                   | 708.3 ± 2.2                   | 1216 ± 4                      |
| 270.25 | 374.2 ± 0.4   | 382.3 ± 1.8                   | 349.5 ± 1.0 | 354.0 ± 1.1                   | 728.3 ± 2.4                   | 1244 ± 4                      |
| 270.5  | 381.7 ± 0.4   | 393.5 ± 2.0                   | 355.2 ± 1.0 | 364.7 ± 1.3                   | 748.9 ± 2.5                   | 1272 ± 4                      |
| 270.75 | 389.2 ± 0.5   | 405.1 ± 2.2                   | 360.9 ± 1.0 | 375.7 ± 1.4                   | 770.0 ± 2.7                   | 1301 ± 4                      |
| 271.0  | 396.9 ± 0.5   | 416.9 ± 2.4                   | 366.7 ± 1.1 | 387.0 ± 1.6                   | 791.6 ± 3.0                   | 1330 ± 4                      |
| 271.25 | 404.7 ± 0.6   | 429.2 ± 2.7                   | 372.6 ± 1.1 | 398.6 ± 1.7                   | 813.8 ± 3.2                   | 1360 ± 4                      |
| 271.5  | 412.7 ± 0.6   | 441.7 ± 2.9                   | 378.6 ± 1.2 | 410.5 ± 1.9                   | 836.7 ± 3.5                   | 1391 ± 5                      |
| 271.75 | 420.8 ± 0.7   | 454.6 ± 3.2                   | 384.7 ± 1.2 | 422.8 ± 2.1                   | 860 ± 4                       | 1422 ± 5                      |
| 272.0  | 429.1 ± 0.7   | 467.8 ± 3.5                   | 390.9 ± 1.3 | 435.4 ± 2.3                   | 884 ± 4                       | 1454 ± 5                      |
| 272.25 | 437.5 ± 0.8   | 481 ± 4                       | 397.1 ± 1.4 | 448.3 ± 2.5                   | 909 ± 4                       | 1487 ± 5                      |
| 272.5  | 446.0 ± 0.8   | 495 ± 4                       | 403.4 ± 1.5 | 461.7 ± 2.8                   | 934 ± 5                       | 1520 ± 6                      |
| 272.75 | 454.7 ± 0.9   | 510 ± 5                       | 409.9 ± 1.6 | 475.4 ± 3.0                   | 960 ± 5                       | 1554 ± 6                      |
| 273.0  | 463.6 ± 0.9   | 524 ± 5                       | 416.4 ± 1.7 | 489.4 ± 3.2                   | 986 ± 6                       | 1588 ± 6                      |
| 273.25 | 472.6 ± 1.0   | 540 ± 5                       | 423.0 ± 1.8 | 503.9 ± 3.5                   | 1014 ± 6                      | 1624 ± 7                      |
| 273.5  | 481.8 ± 1.1   | 555 ± 6                       | 429.7 ± 1.9 | 519 ± 4                       | 1042 ± 7                      | 1660 ± 7                      |
| 273.75 | 491.1 ± 1.2   | 571 ± 6                       | 436.5 ± 2.0 | 534 ± 4                       | 1070 ± 7                      | 1697 ± 8                      |
| 274.0  | 500.6 ± 1.2   | 587 ± 7                       | 443.4 ± 2.2 | 550 ± 4                       | 1100 ± 8                      | 1734 ± 9                      |
| 274.25 | 510.3 ± 1.3   | 604 ± 7                       | 450.4 ± 2.3 | 566 ± 5                       | 1130 ± 8                      | 1772 ± 9                      |
| 274.5  | 520.1 ± 1.4   | 622 ± 8                       | 457.4 ± 2.4 | 582 ± 5                       | 1161 ± 9                      | 1811 ± 10                     |
| 274.75 | 530.1 ± 1.5   | 639 ± 8                       | 464.6 ± 2.6 | 599 ± 5                       | 1193 ± 9                      | 1851 ± 10                     |
| 275.0  | 540.3 ± 1.6   | 657 ± 9                       | 471.9 ± 2.7 | 617 ± 6                       | 1225 ± 10                     | 1892 ± 11                     |
| 275.25 | 550.7 ± 1.6   | 676 ± 9                       | 479.3 ± 2.9 | 635 ± 6                       | 1259 ± 11                     | 1933 ± 12                     |
| 275.5  | 561.2 ± 1.7   | 695 ± 10                      | 486.8 ± 3.0 | 653 ± 7                       | 1293 ± 11                     | 1976 ± 13                     |
| 275.75 | 571.9 ± 1.8   | 715 ± 10                      | 494.3 ± 3.2 | 672 ± 7                       | 1328 ± 12                     | 2019 ± 13                     |
| 276.0  | 582.8 ± 1.9   | 735 ± 11                      | 502.0 ± 3.3 | 692 ± 7                       | 1364 ± 13                     | 2063 ± 14                     |
| 276.25 | 593.9 ± 2.0   | 756 ± 12                      | 509.8 ± 3.5 | 712 ± 8                       | 1401 ± 14                     | 2108 ± 15                     |
| 276.5  | 605.2 ± 2.1   | 777 ± 12                      | 518 ± 4     | 732 ± 8                       | 1439 ± 14                     | 2154 ± 16                     |
| 276.75 | 616.7 ± 2.2   | 799 ± 13                      | 526 ± 4     | 754 ± 9                       | 1478 ± 15                     | 2200 ± 17                     |
| 277.0  | 628.3 ± 2.3   | 822 ± 14                      | 534 ± 4     | 775 ± 9                       | 1518 ± 16                     | 2248 ± 18                     |
| 277.25 | 640.2 ± 2.5   | 845 ± 15                      | 542 ± 4     | 797 ± 10                      | 1558 ± 17                     | 2297 ± 19                     |
| 277.5  | 652.3 ± 2.6   | 868 ± 16                      | 550 ± 4     | 820 ± 10                      | 1600 ± 18                     | 2346 ± 20                     |
| 277.75 | 664.6 ± 2.7   | 892 ± 16                      | 559 ± 5     | 844 ± 11                      | 1643 ± 19                     | 2397 ± 21                     |
| 278.0  | 677.1 ± 2.8   | 917 ± 17                      | 567 ± 5     | 868 ± 12                      | 1687 ± 20                     | 2448 ± 22                     |
| 278.25 | 689.8 ± 2.9   | 943 ± 18                      | 576 ± 5     | 893 ± 12                      | 1732 ± 21                     | 2501 ± 23                     |
| 278.5  | 702.7 ± 3.1   | 969 ± 19                      | 585 ± 5     | 918 ± 13                      | 1778 ± 22                     | 2554 ± 24                     |
| 278.75 | 715.8 ± 3.2   | 996 ± 20                      | 594 ± 6     | 944 ± 14                      | 1825 ± 23                     | 2609 ± 25                     |
| 279.0  | 729.2 ± 3.4   | 1023 ± 21                     | 603 ± 6     | 971 ± 14                      | 1874 ± 25                     | 2665 ± 26                     |
| 279.25 | 742.8 ± 3.5   | 1052 ± 22                     | 612 ± 6     | 998 ± 15                      | 1924 ± 26                     | 2721 ± 28                     |
| 279.5  | 757 ± 4       | 1081 ± 24                     | 621 ± 6     | 1027 ± 16                     | 1974 ± 27                     | 2779 ± 29                     |
| 279.75 | 771 ± 4       | 1111 ± 25                     | 631 ± 6     | 1056 ± 17                     | 2026 ± 28                     | 2838 ± 30                     |
| 280.0  | 785 ± 4       | 1141 ± 26                     | 640 ± 7     | 1085 ± 17                     | 2080 ± 30                     | 2899 ± 32                     |
| 280.25 | 799 ± 4       | 1172 ± 27                     | 650 ± 7     | 1116 ± 18                     | 2135 ± 31                     | 2960 ± 33                     |
| 280.5  | 814 ± 4       | 1204 ± 29                     | 660 ± 7     | 1147 ± 19                     | 2191 ± 33                     | 3022 ± 35                     |
| 280.75 | 829 ± 4       | 1237 ± 30                     | 670 ± 8     | 1179 ± 20                     | 2248 ± 34                     | $(3.09 \pm 0.04) \times 10^3$ |
| 281.0  | 844 ± 5       | 1271 ± 31                     | 680 ± 8     | 1212 ± 21                     | $(2.31 \pm 0.04) \times 10^3$ | $(3.15 \pm 0.04) \times 10^3$ |
| 281.25 | 860 ± 5       | 1306 ± 33                     | 690 ± 8     | 1246 ± 22                     | $(2.37 \pm 0.04) \times 10^3$ | $(3.22 \pm 0.04) \times 10^3$ |
| 281.5  | 876 ± 5       | 1341 ± 34                     | 700 ± 8     | 1281 ± 23                     | $(2.43 \pm 0.04) \times 10^3$ | $(3.28 \pm 0.04) \times 10^3$ |
| 281.75 | 892 ± 5       | $(1.38 \pm 0.04) \times 10^3$ | 711 ± 9     | 1316 ± 24                     | $(2.49 \pm 0.04) \times 10^3$ | $(3.35 \pm 0.04) \times 10^3$ |
| 282.0  | 908 ± 5       | $(1.41 \pm 0.04) \times 10^3$ | 721 ± 9     | 1353 ± 25                     | $(2.56 \pm 0.04) \times 10^3$ | $(3.42 \pm 0.04) \times 10^3$ |
| 282.25 | 925 ± 6       | $(1.45 \pm 0.04) \times 10^3$ | 732 ± 9     | 1390 ± 26                     | $(2.62 \pm 0.04) \times 10^3$ | $(3.50 \pm 0.05) \times 10^3$ |
| 282.5  | 941 ± 6       | $(1.49 \pm 0.04) \times 10^3$ | 743 ± 10    | 1429 ± 28                     | $(2.69 \pm 0.05) \times 10^3$ | $(3.57 \pm 0.05) \times 10^3$ |
| 282.75 | 959 ± 6       | $(1.53 \pm 0.04) \times 10^3$ | 754 ± 10    | 1468 ± 29                     | $(2.76 \pm 0.05) \times 10^3$ | $(3.64 \pm 0.05) \times 10^3$ |
| 283.0  | 976 ± 6       | $(1.57 \pm 0.04) \times 10^3$ | 765 ± 10    | 1509 ± 30                     | $(2.83 \pm 0.05) \times 10^3$ | $(3.72 \pm 0.05) \times 10^3$ |
| 283.25 | 994 ± 6       | $(1.62 \pm 0.05) \times 10^3$ | 777 ± 11    | 1550 ± 32                     | $(2.90 \pm 0.05) \times 10^3$ | $(3.79 \pm 0.05) \times 10^3$ |
| 283.5  | 1012 ± 7      | $(1.66 \pm 0.05) \times 10^3$ | 788 ± 11    | 1593 ± 33                     | $(2.98 \pm 0.06) \times 10^3$ | $(3.87 \pm 0.06) \times 10^3$ |
| 283.75 | 1030 ± 7      | $(1.70 \pm 0.05) \times 10^3$ | 800 ± 11    | 1636 ± 34                     | $(3.06 \pm 0.06) \times 10^3$ | $(3.95 \pm 0.06) \times 10^3$ |
| 284.0  | 1048 ± 7      | $(1.75 \pm 0.05) \times 10^3$ | 811 ± 12    | $(1.68 \pm 0.04) \times 10^3$ | $(3.13 \pm 0.06) \times 10^3$ | $(4.03 \pm 0.06) \times 10^3$ |
| 284.25 | 1067 ± 7      | $(1.80 \pm 0.06) \times 10^3$ | 823 ± 12    | $(1.73 \pm 0.04) \times 10^3$ | $(3.21 \pm 0.06) \times 10^3$ | $(4.12 \pm 0.06) \times 10^3$ |
| 284.5  | 1086 ± 8      | $(1.84 \pm 0.06) \times 10^3$ | 835 ± 12    | $(1.77 \pm 0.04) \times 10^3$ | $(3.30 \pm 0.07) \times 10^3$ | $(4.20 \pm 0.07) \times 10^3$ |
| 284.75 | 1106 ± 8      | $(1.89 \pm 0.06) \times 10^3$ | 848 ± 13    | $(1.82 \pm 0.04) \times 10^3$ | $(3.38 \pm 0.07) \times 10^3$ | $(4.29 \pm 0.07) \times 10^3$ |
| 285.0  | 1126 ± 8      | $(1.94 \pm 0.06) \times 10^3$ | 860 ± 13    | $(1.87 \pm 0.04) \times 10^3$ | $(3.47 \pm 0.07) \times 10^3$ | $(4.38 \pm 0.07) \times 10^3$ |

Table 6: CONT: Exchange rates extrapolated to 310 K, 1M glucose at pH=7.38, using restricted model, with partial assignment.

| T(K)   | $C_6$                           | $C_{3/4}$                       | $C_{3/4}$                       | $C_2$                           | $C_{1,\alpha}$                    | $C_{1,\beta}$                     |
|--------|---------------------------------|---------------------------------|---------------------------------|---------------------------------|-----------------------------------|-----------------------------------|
| 285.25 | 1146 ± 8                        | (1.99 ± 0.07) × 10 <sup>3</sup> | 873 ± 14                        | (1.92 ± 0.04) × 10 <sup>3</sup> | (3.55 ± 0.07) × 10 <sup>3</sup>   | (4.47 ± 0.07) × 10 <sup>3</sup>   |
| 285.5  | 1166 ± 9                        | (2.05 ± 0.07) × 10 <sup>3</sup> | 885 ± 14                        | (1.97 ± 0.05) × 10 <sup>3</sup> | (3.64 ± 0.08) × 10 <sup>3</sup>   | (4.56 ± 0.08) × 10 <sup>3</sup>   |
| 285.75 | 1187 ± 9                        | (2.10 ± 0.07) × 10 <sup>3</sup> | 898 ± 14                        | (2.03 ± 0.05) × 10 <sup>3</sup> | (3.74 ± 0.08) × 10 <sup>3</sup>   | (4.65 ± 0.08) × 10 <sup>3</sup>   |
| 286.0  | 1208 ± 9                        | (2.16 ± 0.07) × 10 <sup>3</sup> | 911 ± 15                        | (2.08 ± 0.05) × 10 <sup>3</sup> | (3.83 ± 0.08) × 10 <sup>3</sup>   | (4.74 ± 0.08) × 10 <sup>3</sup>   |
| 286.25 | 1230 ± 9                        | (2.21 ± 0.08) × 10 <sup>3</sup> | 924 ± 15                        | (2.14 ± 0.05) × 10 <sup>3</sup> | (3.93 ± 0.09) × 10 <sup>3</sup>   | (4.84 ± 0.08) × 10 <sup>3</sup>   |
| 286.5  | 1251 ± 10                       | (2.27 ± 0.08) × 10 <sup>3</sup> | 938 ± 16                        | (2.20 ± 0.05) × 10 <sup>3</sup> | (4.03 ± 0.09) × 10 <sup>3</sup>   | (4.94 ± 0.09) × 10 <sup>3</sup>   |
| 286.75 | 1273 ± 10                       | (2.33 ± 0.08) × 10 <sup>3</sup> | 951 ± 16                        | (2.26 ± 0.06) × 10 <sup>3</sup> | (4.13 ± 0.09) × 10 <sup>3</sup>   | (5.04 ± 0.09) × 10 <sup>3</sup>   |
| 287.0  | 1296 ± 10                       | (2.39 ± 0.09) × 10 <sup>3</sup> | 965 ± 17                        | (2.32 ± 0.06) × 10 <sup>3</sup> | (4.23 ± 0.10) × 10 <sup>3</sup>   | (5.14 ± 0.09) × 10 <sup>3</sup>   |
| 287.25 | 1319 ± 11                       | (2.45 ± 0.09) × 10 <sup>3</sup> | 979 ± 17                        | (2.38 ± 0.06) × 10 <sup>3</sup> | (4.34 ± 0.10) × 10 <sup>3</sup>   | (5.24 ± 0.10) × 10 <sup>3</sup>   |
| 287.5  | 1342 ± 11                       | (2.52 ± 0.09) × 10 <sup>3</sup> | 993 ± 18                        | (2.44 ± 0.06) × 10 <sup>3</sup> | (4.45 ± 0.10) × 10 <sup>3</sup>   | (5.35 ± 0.10) × 10 <sup>3</sup>   |
| 287.75 | 1366 ± 11                       | (2.58 ± 0.10) × 10 <sup>3</sup> | 1007 ± 18                       | (2.51 ± 0.07) × 10 <sup>3</sup> | (4.56 ± 0.11) × 10 <sup>3</sup>   | (5.46 ± 0.10) × 10 <sup>3</sup>   |
| 288.0  | 1389 ± 12                       | (2.65 ± 0.10) × 10 <sup>3</sup> | 1022 ± 18                       | (2.57 ± 0.07) × 10 <sup>3</sup> | (4.67 ± 0.11) × 10 <sup>3</sup>   | (5.57 ± 0.11) × 10 <sup>3</sup>   |
| 288.25 | 1414 ± 12                       | (2.72 ± 0.10) × 10 <sup>3</sup> | 1036 ± 19                       | (2.64 ± 0.07) × 10 <sup>3</sup> | (4.79 ± 0.12) × 10 <sup>3</sup>   | (5.68 ± 0.11) × 10 <sup>3</sup>   |
| 288.5  | 1439 ± 12                       | (2.79 ± 0.11) × 10 <sup>3</sup> | 1051 ± 20                       | (2.71 ± 0.07) × 10 <sup>3</sup> | (4.90 ± 0.12) × 10 <sup>3</sup>   | (5.79 ± 0.12) × 10 <sup>3</sup>   |
| 288.75 | 1464 ± 13                       | (2.86 ± 0.11) × 10 <sup>3</sup> | 1066 ± 20                       | (2.78 ± 0.08) × 10 <sup>3</sup> | (5.03 ± 0.13) × 10 <sup>3</sup>   | (5.91 ± 0.12) × 10 <sup>3</sup>   |
| 289.0  | 1489 ± 13                       | (2.94 ± 0.12) × 10 <sup>3</sup> | 1081 ± 21                       | (2.86 ± 0.08) × 10 <sup>3</sup> | (5.15 ± 0.13) × 10 <sup>3</sup>   | (6.02 ± 0.12) × 10 <sup>3</sup>   |
| 289.25 | 1515 ± 13                       | (3.01 ± 0.12) × 10 <sup>3</sup> | 1096 ± 21                       | (2.93 ± 0.08) × 10 <sup>3</sup> | (5.28 ± 0.13) × 10 <sup>3</sup>   | (6.14 ± 0.13) × 10 <sup>3</sup>   |
| 289.5  | 1541 ± 14                       | (3.09 ± 0.13) × 10 <sup>3</sup> | 1112 ± 22                       | (3.01 ± 0.09) × 10 <sup>3</sup> | (5.41 ± 0.14) × 10 <sup>3</sup>   | (6.27 ± 0.13) × 10 <sup>3</sup>   |
| 289.75 | 1568 ± 14                       | (3.17 ± 0.13) × 10 <sup>3</sup> | 1128 ± 22                       | (3.09 ± 0.09) × 10 <sup>3</sup> | (5.54 ± 0.14) × 10 <sup>3</sup>   | (6.39 ± 0.14) × 10 <sup>3</sup>   |
| 290.0  | 1595 ± 15                       | (3.25 ± 0.13) × 10 <sup>3</sup> | 1144 ± 23                       | (3.17 ± 0.09) × 10 <sup>3</sup> | (5.68 ± 0.15) × 10 <sup>3</sup>   | (6.52 ± 0.14) × 10 <sup>3</sup>   |
| 290.25 | 1623 ± 15                       | (3.33 ± 0.14) × 10 <sup>3</sup> | 1160 ± 23                       | (3.25 ± 0.10) × 10 <sup>3</sup> | (5.82 ± 0.16) × 10 <sup>3</sup>   | (6.64 ± 0.14) × 10 <sup>3</sup>   |
| 290.5  | 1651 ± 15                       | (3.42 ± 0.14) × 10 <sup>3</sup> | 1176 ± 24                       | (3.34 ± 0.10) × 10 <sup>3</sup> | (5.96 ± 0.16) × 10 <sup>3</sup>   | (6.78 ± 0.15) × 10 <sup>3</sup>   |
| 290.75 | 1679 ± 16                       | (3.50 ± 0.15) × 10 <sup>3</sup> | 1193 ± 25                       | (3.43 ± 0.10) × 10 <sup>3</sup> | (6.10 ± 0.17) × 10 <sup>3</sup>   | (6.91 ± 0.15) × 10 <sup>3</sup>   |
| 291.0  | 1708 ± 16                       | (3.59 ± 0.16) × 10 <sup>3</sup> | 1209 ± 25                       | (3.51 ± 0.11) × 10 <sup>3</sup> | (6.25 ± 0.17) × 10 <sup>3</sup>   | (7.04 ± 0.16) × 10 <sup>3</sup>   |
| 291.25 | 1737 ± 17                       | (3.68 ± 0.16) × 10 <sup>3</sup> | 1226 ± 26                       | (3.61 ± 0.11) × 10 <sup>3</sup> | (6.41 ± 0.18) × 10 <sup>3</sup>   | (7.18 ± 0.16) × 10 <sup>3</sup>   |
| 291.5  | 1767 ± 17                       | (3.78 ± 0.17) × 10 <sup>3</sup> | 1243 ± 27                       | (3.70 ± 0.11) × 10 <sup>3</sup> | (6.56 ± 0.18) × 10 <sup>3</sup>   | (7.32 ± 0.17) × 10 <sup>3</sup>   |
| 291.75 | 1797 ± 18                       | (3.87 ± 0.17) × 10 <sup>3</sup> | 1261 ± 27                       | (3.80 ± 0.12) × 10 <sup>3</sup> | (6.72 ± 0.19) × 10 <sup>3</sup>   | (7.47 ± 0.17) × 10 <sup>3</sup>   |
| 292.0  | 1828 ± 18                       | (3.97 ± 0.18) × 10 <sup>3</sup> | 1278 ± 28                       | (3.89 ± 0.12) × 10 <sup>3</sup> | (6.88 ± 0.20) × 10 <sup>3</sup>   | (7.61 ± 0.18) × 10 <sup>3</sup>   |
| 292.25 | 1859 ± 19                       | (4.07 ± 0.19) × 10 <sup>3</sup> | 1296 ± 29                       | (3.99 ± 0.13) × 10 <sup>3</sup> | (7.05 ± 0.20) × 10 <sup>3</sup>   | (7.76 ± 0.18) × 10 <sup>3</sup>   |
| 292.5  | 1890 ± 19                       | (4.17 ± 0.19) × 10 <sup>3</sup> | 1314 ± 29                       | (4.10 ± 0.13) × 10 <sup>3</sup> | (7.22 ± 0.21) × 10 <sup>3</sup>   | (7.91 ± 0.19) × 10 <sup>3</sup>   |
| 292.75 | 1923 ± 20                       | (4.28 ± 0.20) × 10 <sup>3</sup> | 1332 ± 30                       | (4.20 ± 0.14) × 10 <sup>3</sup> | (7.39 ± 0.22) × 10 <sup>3</sup>   | (8.06 ± 0.19) × 10 <sup>3</sup>   |
| 293.0  | 1955 ± 20                       | (4.39 ± 0.21) × 10 <sup>3</sup> | 1351 ± 31                       | (4.31 ± 0.14) × 10 <sup>3</sup> | (7.57 ± 0.23) × 10 <sup>3</sup>   | (8.22 ± 0.20) × 10 <sup>3</sup>   |
| 293.25 | 1988 ± 21                       | (4.50 ± 0.21) × 10 <sup>3</sup> | 1369 ± 31                       | (4.42 ± 0.15) × 10 <sup>3</sup> | (7.75 ± 0.23) × 10 <sup>3</sup>   | (8.38 ± 0.21) × 10 <sup>3</sup>   |
| 293.5  | 2022 ± 21                       | (4.61 ± 0.22) × 10 <sup>3</sup> | 1388 ± 32                       | (4.54 ± 0.15) × 10 <sup>3</sup> | (7.94 ± 0.24) × 10 <sup>3</sup>   | (8.54 ± 0.21) × 10 <sup>3</sup>   |
| 293.75 | 2056 ± 22                       | (4.72 ± 0.23) × 10 <sup>3</sup> | 1407 ± 33                       | (4.65 ± 0.16) × 10 <sup>3</sup> | (8.13 ± 0.25) × 10 <sup>3</sup>   | (8.71 ± 0.22) × 10 <sup>3</sup>   |
| 294.0  | 2091 ± 23                       | (4.84 ± 0.23) × 10 <sup>3</sup> | 1427 ± 34                       | (4.77 ± 0.16) × 10 <sup>3</sup> | (8.33 ± 0.26) × 10 <sup>3</sup>   | (8.87 ± 0.23) × 10 <sup>3</sup>   |
| 294.25 | 2126 ± 23                       | (4.96 ± 0.24) × 10 <sup>3</sup> | 1446 ± 34                       | (4.89 ± 0.17) × 10 <sup>3</sup> | (8.52 ± 0.27) × 10 <sup>3</sup>   | (9.04 ± 0.23) × 10 <sup>3</sup>   |
| 294.5  | 2161 ± 24                       | (5.09 ± 0.25) × 10 <sup>3</sup> | 1466 ± 35                       | (5.02 ± 0.17) × 10 <sup>3</sup> | (8.73 ± 0.28) × 10 <sup>3</sup>   | (9.22 ± 0.24) × 10 <sup>3</sup>   |
| 294.75 | 2198 ± 24                       | (5.21 ± 0.26) × 10 <sup>3</sup> | (1.49 ± 0.04) × 10 <sup>3</sup> | (5.14 ± 0.18) × 10 <sup>3</sup> | (8.93 ± 0.29) × 10 <sup>3</sup>   | (9.39 ± 0.25) × 10 <sup>3</sup>   |
| 295.0  | 2234 ± 25                       | (5.34 ± 0.27) × 10 <sup>3</sup> | (1.51 ± 0.04) × 10 <sup>3</sup> | (5.27 ± 0.19) × 10 <sup>3</sup> | (9.15 ± 0.29) × 10 <sup>3</sup>   | (9.57 ± 0.25) × 10 <sup>3</sup>   |
| 295.25 | 2272 ± 26                       | (5.47 ± 0.28) × 10 <sup>3</sup> | (1.53 ± 0.04) × 10 <sup>3</sup> | (5.41 ± 0.19) × 10 <sup>3</sup> | (9.36 ± 0.30) × 10 <sup>3</sup>   | (9.76 ± 0.26) × 10 <sup>3</sup>   |
| 295.5  | 2309 ± 26                       | (5.61 ± 0.29) × 10 <sup>3</sup> | (1.55 ± 0.04) × 10 <sup>3</sup> | (5.54 ± 0.20) × 10 <sup>3</sup> | (9.59 ± 0.31) × 10 <sup>3</sup>   | (9.94 ± 0.27) × 10 <sup>3</sup>   |
| 295.75 | 2348 ± 27                       | (5.75 ± 0.30) × 10 <sup>3</sup> | (1.57 ± 0.04) × 10 <sup>3</sup> | (5.68 ± 0.20) × 10 <sup>3</sup> | (9.81 ± 0.32) × 10 <sup>3</sup>   | (1.013 ± 0.027) × 10 <sup>4</sup> |
| 296.0  | 2387 ± 28                       | (5.89 ± 0.31) × 10 <sup>3</sup> | (1.59 ± 0.04) × 10 <sup>3</sup> | (5.83 ± 0.21) × 10 <sup>3</sup> | (1.004 ± 0.033) × 10 <sup>4</sup> | (1.032 ± 0.028) × 10 <sup>4</sup> |
| 296.25 | 2426 ± 28                       | (6.03 ± 0.32) × 10 <sup>3</sup> | (1.61 ± 0.04) × 10 <sup>3</sup> | (5.97 ± 0.22) × 10 <sup>3</sup> | (1.028 ± 0.035) × 10 <sup>4</sup> | (1.052 ± 0.029) × 10 <sup>4</sup> |
| 296.5  | 2467 ± 29                       | (6.18 ± 0.33) × 10 <sup>3</sup> | (1.63 ± 0.04) × 10 <sup>3</sup> | (6.12 ± 0.23) × 10 <sup>3</sup> | (1.05 ± 0.04) × 10 <sup>4</sup>   | (1.072 ± 0.030) × 10 <sup>4</sup> |
| 296.75 | 2507 ± 30                       | (6.33 ± 0.34) × 10 <sup>3</sup> | (1.66 ± 0.04) × 10 <sup>3</sup> | (6.28 ± 0.23) × 10 <sup>3</sup> | (1.08 ± 0.04) × 10 <sup>4</sup>   | (1.092 ± 0.031) × 10 <sup>4</sup> |
| 297.0  | 2549 ± 30                       | (6.49 ± 0.35) × 10 <sup>3</sup> | (1.68 ± 0.04) × 10 <sup>3</sup> | (6.44 ± 0.24) × 10 <sup>3</sup> | (1.10 ± 0.04) × 10 <sup>4</sup>   | (1.113 ± 0.032) × 10 <sup>4</sup> |
| 297.25 | 2591 ± 31                       | (6.6 ± 0.4) × 10 <sup>3</sup>   | (1.70 ± 0.05) × 10 <sup>3</sup> | (6.60 ± 0.25) × 10 <sup>3</sup> | (1.13 ± 0.04) × 10 <sup>4</sup>   | (1.134 ± 0.032) × 10 <sup>4</sup> |
| 297.5  | 2633 ± 32                       | (6.8 ± 0.4) × 10 <sup>3</sup>   | (1.72 ± 0.05) × 10 <sup>3</sup> | (6.76 ± 0.26) × 10 <sup>3</sup> | (1.15 ± 0.04) × 10 <sup>4</sup>   | (1.155 ± 0.033) × 10 <sup>4</sup> |
| 297.75 | 2677 ± 33                       | (7.0 ± 0.4) × 10 <sup>3</sup>   | (1.75 ± 0.05) × 10 <sup>3</sup> | (6.93 ± 0.27) × 10 <sup>3</sup> | (1.18 ± 0.04) × 10 <sup>4</sup>   | (1.177 ± 0.034) × 10 <sup>4</sup> |
| 298.0  | 2720 ± 34                       | (7.1 ± 0.4) × 10 <sup>3</sup>   | (1.77 ± 0.05) × 10 <sup>3</sup> | (7.10 ± 0.27) × 10 <sup>3</sup> | (1.21 ± 0.04) × 10 <sup>4</sup>   | (1.199 ± 0.035) × 10 <sup>4</sup> |
| 298.25 | 2765 ± 34                       | (7.3 ± 0.4) × 10 <sup>3</sup>   | (1.79 ± 0.05) × 10 <sup>3</sup> | (7.28 ± 0.28) × 10 <sup>3</sup> | (1.24 ± 0.04) × 10 <sup>4</sup>   | (1.222 ± 0.04) × 10 <sup>4</sup>  |
| 298.5  | 2810 ± 35                       | (7.5 ± 0.4) × 10 <sup>3</sup>   | (1.82 ± 0.05) × 10 <sup>3</sup> | (7.46 ± 0.29) × 10 <sup>3</sup> | (1.27 ± 0.05) × 10 <sup>4</sup>   | (1.24 ± 0.04) × 10 <sup>4</sup>   |
| 298.75 | (2.86 ± 0.04) × 10 <sup>3</sup> | (7.7 ± 0.4) × 10 <sup>3</sup>   | (1.84 ± 0.05) × 10 <sup>3</sup> | (7.64 ± 0.30) × 10 <sup>3</sup> | (1.29 ± 0.05) × 10 <sup>4</sup>   | (1.27 ± 0.04) × 10 <sup>4</sup>   |
| 299.0  | (2.90 ± 0.04) × 10 <sup>3</sup> | (7.9 ± 0.4) × 10 <sup>3</sup>   | (1.87 ± 0.05) × 10 <sup>3</sup> | (7.83 ± 0.31) × 10 <sup>3</sup> | (1.32 ± 0.05) × 10 <sup>4</sup>   | (1.29 ± 0.04) × 10 <sup>4</sup>   |
| 299.25 | (2.95 ± 0.04) × 10 <sup>3</sup> | (8.0 ± 0.5) × 10 <sup>3</sup>   | (1.89 ± 0.05) × 10 <sup>3</sup> | (8.02 ± 0.32) × 10 <sup>3</sup> | (1.36 ± 0.05) × 10 <sup>4</sup>   | (1.31 ± 0.04) × 10 <sup>4</sup>   |
| 299.5  | (3.00 ± 0.04) × 10 <sup>3</sup> | (8.2 ± 0.5) × 10 <sup>3</sup>   | (1.92 ± 0.05) × 10 <sup>3</sup> | (8.22 ± 0.33) × 10 <sup>3</sup> | (1.39 ± 0.05) × 10 <sup>4</sup>   | (1.34 ± 0.04) × 10 <sup>4</sup>   |
| 299.75 | (3.05 ± 0.04) × 10 <sup>3</sup> | (8.4 ± 0.5) × 10 <sup>3</sup>   | (1.94 ± 0.06) × 10 <sup>3</sup> | (8.42 ± 0.34) × 10 <sup>3</sup> | (1.42 ± 0.05) × 10 <sup>4</sup>   | (1.36 ± 0.04) × 10 <sup>4</sup>   |
| 300.0  | (3.10 ± 0.04) × 10 <sup>3</sup> | (8.6 ± 0.5) × 10 <sup>3</sup>   | (1.97 ± 0.06) × 10 <sup>3</sup> | (8.63 ± 0.35) × 10 <sup>3</sup> | (1.45 ± 0.05) × 10 <sup>4</sup>   | (1.39 ± 0.04) × 10 <sup>4</sup>   |
| 300.25 | (3.15 ± 0.04) × 10 <sup>3</sup> | (8.8 ± 0.5) × 10 <sup>3</sup>   | (1.99 ± 0.06) × 10 <sup>3</sup> | (8.8 ± 0.4) × 10 <sup>3</sup>   | (1.48 ± 0.06) × 10 <sup>4</sup>   | (1.41 ± 0.04) × 10 <sup>4</sup>   |
| 300.5  | (3.20 ± 0.04) × 10 <sup>3</sup> | (9.1 ± 0.5) × 10 <sup>3</sup>   | (2.02 ± 0.06) × 10 <sup>3</sup> | (9.1 ± 0.4) × 10 <sup>3</sup>   | (1.52 ± 0.06) × 10 <sup>4</sup>   | (1.44 ± 0.05) × 10 <sup>4</sup>   |
| 300.75 | (3.25 ± 0.04) × 10 <sup>3</sup> | (9.3 ± 0.6) × 10 <sup>3</sup>   | (2.05 ± 0.06) × 10 <sup>3</sup> | (9.3 ± 0.4) × 10 <sup>3</sup>   | (1.55 ± 0.06) × 10 <sup>4</sup>   | (1.47 ± 0.05) × 10 <sup>4</sup>   |
| 301.0  | (3.30 ± 0.04) × 10 <sup>3</sup> | (9.5 ± 0.6) × 10 <sup>3</sup>   | (2.07 ± 0.06) × 10 <sup>3</sup> | (9.5 ± 0.4) × 10 <sup>3</sup>   | (1.59 ± 0.06) × 10 <sup>4</sup>   | (1.49 ± 0.05) × 10 <sup>4</sup>   |
| 301.25 | (3.35 ± 0.05) × 10 <sup>3</sup> | (9.7 ± 0.6) × 10 <sup>3</sup>   | (2.10 ± 0.06) × 10 <sup>3</sup> | (9.7 ± 0.4) × 10 <sup>3</sup>   | (1.62 ± 0.06) × 10 <sup>4</sup>   | (1.52 ± 0.05) × 10 <sup>4</sup>   |
| 301.5  | (3.41 ± 0.05) × 10 <sup>3</sup> | (9.9 ± 0.6) × 10 <sup>3</sup>   | (2.13 ± 0.06) × 10 <sup>3</sup> | (1.00 ± 0.04) × 10 <sup>4</sup> | (1.66 ± 0.07) × 10 <sup>4</sup>   | (1.55 ± 0.05) × 10 <sup>4</sup>   |
| 301.75 | (3.46 ± 0.05) × 10 <sup>3</sup> | (1.02 ± 0.06) × 10 <sup>4</sup> | (2.16 ± 0.07) × 10 <sup>3</sup> | (1.02 ± 0.04) × 10 <sup>4</sup> | (1.70 ± 0.07) × 10 <sup>4</sup>   | (1.58 ± 0.05) × 10 <sup>4</sup>   |
| 302.0  | (3.52 ± 0.05) × 10 <sup>3</sup> | (1.04 ± 0.06) × 10 <sup>4</sup> | (2.18 ± 0.07) × 10 <sup>3</sup> | (1.05 ± 0.05) × 10 <sup>4</sup> | (1.74 ± 0.07) × 10 <sup>4</sup>   | (1.61 ± 0.05) × 10 <sup>4</sup>   |
| 302.25 | (3.57 ± 0.05) × 10 <sup>3</sup> | (1.07 ± 0.07) × 10 <sup>4</sup> | (2.21 ± 0.07) × 10 <sup>3</sup> | (1.07 ± 0.05) × 10 <sup>4</sup> | (1.78 ± 0.07) × 10 <sup>4</sup>   | (1.64 ± 0.05) × 10 <sup>4</sup>   |
| 302.5  | (3.63 ± 0.05) × 10 <sup>3</sup> | (1.09 ± 0.07) × 10 <sup>4</sup> | (2.24 ± 0.07) × 10 <sup>3</sup> | (1.10 ± 0.05) × 10 <sup>4</sup> | (1.82 ± 0.07) × 10 <sup>4</sup>   | (1.67 ± 0.06) × 10 <sup>4</sup>   |
| 302.75 | (3.69 ± 0.05) × 10 <sup>3</sup> | (1.12 ± 0.07) × 10 <sup>4</sup> | (2.27 ± 0.07) × 10 <sup>3</sup> | (1.12 ± 0.05) × 10 <sup>4</sup> | (1.86 ± 0.08) × 10 <sup>4</sup>   | (1.70 ± 0.06) × 10 <sup>4</sup>   |
| 303.0  | (3.75 ± 0.05) × 10 <sup>3</sup> | (1.14 ± 0.07) × 10 <sup>4</sup> | (2.30 ± 0.07) × 10 <sup>3</sup> | (1.15 ± 0.05) × 10 <sup>4</sup> | (1.90 ± 0.08) × 10 <sup>4</sup>   | (1.73 ± 0.06) × 10 <sup>4</sup>   |
| 303.25 | (3.80 ± 0.05) × 10 <sup>3</sup> | (1.17 ± 0.08) × 10 <sup>4</sup> | (2.33 ± 0.07) × 10 <sup>3</sup> | (1.18 ± 0.05) × 10 <sup>4</sup> | (1.94 ± 0.08) × 10 <sup>4</sup>   | (1.76 ± 0.06) × 10 <sup>4</sup>   |
| 303.5  | (3.86 ± 0.06) × 10 <sup>3</sup> | (1.20 ± 0.08) × 10 <sup>4</sup> | (2.36 ± 0.08) × 10 <sup>3</sup> | (1.21 ± 0.05) × 10 <sup>4</sup> | (1.99 ± 0.08) × 10 <sup>4</sup>   | (1.79 ± 0.06) × 10 <sup>4</sup>   |
| 303.75 | (3.93 ± 0.06) × 10 <sup>3</sup> | (1.23 ± 0.08) × 10 <sup>4</sup> | (2.39 ± 0.08) × 10 <sup>3</sup> | (1.24 ± 0.06) × 10 <sup>4</sup> | (2.03 ± 0.09) × 10 <sup>4</sup>   | (1.82 ± 0.06) × 10 <sup>4</sup>   |
| 304.0  | (3.99 ± 0.06) × 10 <sup>3</sup> | (1.25 ± 0.08) × 10 <sup>4</sup> | (2.42 ± 0.08) × 10 <sup>3</sup> | (1.27 ± 0.06) × 10 <sup>4</sup> | (2.08 ± 0.09) × 10 <sup>4</sup>   | (1.86 ± 0.06) × 10 <sup>4</sup>   |
| 304.25 | (4.05 ± 0.06) × 10 <sup>3</sup> | (1.28 ± 0.08) × 10 <sup>4</sup> | (2.45 ± 0.08) × 10 <sup>3</sup> | (1.30 ± 0.06) × 10 <sup>4</sup> | (2.12 ± 0.09) × 10 <sup>4</sup>   | (1.89 ± 0.07) × 10 <sup>4</sup>   |
| 304.5  | (4.11 ± 0.06) × 10 <sup>3</sup> | (1.31 ± 0.09) × 10 <sup>4</sup> | (2.48 ± 0.08) × 10 <sup>3</sup> | (1.33 ± 0.06) × 10 <sup>4</sup> | (2.17 ± 0.09) × 10 <sup>4</sup>   | (1.92 ± 0.07) × 10 <sup>4</sup>   |
| 304.75 | (4.18 ± 0.06) ×                 |                                 |                                 |                                 |                                   |                                   |

Table 7: Chem shifts, 1M glucose at pH=6.21, using restricted model, with partial assignment. Signals 1 to 5

| T(K)   | $C_6$                 | $C_{3/4\alpha}$     | $C_{3/4\beta}$        | $C_{3/4\alpha}$       | $C_{3/4\beta}$        |
|--------|-----------------------|---------------------|-----------------------|-----------------------|-----------------------|
| 269.27 | $0.78885 \pm 0.00011$ | $1.2290 \pm 0.0011$ | $1.37237 \pm 0.00024$ | $1.2198 \pm 0.0005$   | $1.43349 \pm 0.00015$ |
| 274.23 | $0.78644 \pm 0.00015$ | $1.2411 \pm 0.0018$ | $1.3686 \pm 0.0008$   | $1.2199 \pm 0.0005$   | $1.4326 \pm 0.0005$   |
| 279.19 | $0.78655 \pm 0.00023$ | $1.2499 \pm 0.0008$ | $1.3615 \pm 0.0030$   | $1.22000 \pm 0.00023$ | $1.4299 \pm 0.0014$   |
| 284.15 | $0.7786 \pm 0.0004$   | $1.2497 \pm 0.0028$ | $1.316 \pm 0.006$     | $1.2194 \pm 0.0015$   | $1.4487 \pm 0.0024$   |
| 289.11 | $0.7672 \pm 0.0009$   | $1.248 \pm 0.004$   | $1.313 \pm 0.010$     | $1.2199 \pm 0.0031$   | $1.434 \pm 0.004$     |
| 294.06 | $0.7603 \pm 0.0021$   | $1.244 \pm 0.016$   | $1.331 \pm 0.007$     | $1.204 \pm 0.008$     | $1.422 \pm 0.004$     |

Table 8: Chem shifts, 1M glucose at pH=6.21, using restricted model, with partial assignment. Signals 6 to 9

| T(K)   | $C_{2,\alpha}$        | $C_{2,\beta}$         | $C_{1,\alpha}$        | $C_{1,\beta}$         |
|--------|-----------------------|-----------------------|-----------------------|-----------------------|
| 269.27 | $1.07148 \pm 0.00012$ | $1.25909 \pm 0.00028$ | $2.06430 \pm 0.00004$ | $2.81704 \pm 0.00009$ |
| 274.23 | $1.06993 \pm 0.00022$ | $1.2601 \pm 0.0007$   | $2.07862 \pm 0.00008$ | $2.82553 \pm 0.00014$ |
| 279.19 | $1.0667 \pm 0.0006$   | $1.2597 \pm 0.0007$   | $2.09270 \pm 0.00016$ | $2.83369 \pm 0.00024$ |
| 284.15 | $1.0639 \pm 0.0012$   | $1.2686 \pm 0.0020$   | $2.10148 \pm 0.00029$ | $2.8372 \pm 0.0004$   |
| 289.11 | $1.0576 \pm 0.0021$   | $1.265 \pm 0.004$     | $2.1105 \pm 0.0006$   | $2.8386 \pm 0.0007$   |
| 294.06 | $1.049 \pm 0.005$     | $1.257 \pm 0.006$     | $2.1169 \pm 0.0010$   | $2.8351 \pm 0.0012$   |

Table 9: Chem shifts, 1M glucose at pH=7.00, using restricted model, with partial assignment. Signals 1 to 5

| T(K)   | $C_6$                 | $C_{3/4\alpha}$     | $C_{3/4\beta}$        | $C_{3/4\alpha}$       | $C_{3/4\beta}$        |
|--------|-----------------------|---------------------|-----------------------|-----------------------|-----------------------|
| 267.88 | $0.77826 \pm 0.00006$ | $1.2139 \pm 0.0010$ | $1.35360 \pm 0.00027$ | $1.2139 \pm 0.0010$   | $1.43178 \pm 0.00020$ |
| 268.92 | $0.77559 \pm 0.00007$ | $1.2138 \pm 0.0009$ | $1.35343 \pm 0.00035$ | $1.2127 \pm 0.0008$   | $1.42465 \pm 0.00027$ |
| 271.53 | $0.77860 \pm 0.00008$ | $1.2347 \pm 0.0013$ | $1.3416 \pm 0.0023$   | $1.21999 \pm 0.00018$ | $1.4290 \pm 0.0009$   |
| 274.13 | $0.77544 \pm 0.00012$ | $1.2373 \pm 0.0008$ | $1.30002 \pm 0.00010$ | $1.21998 \pm 0.00012$ | $1.4377 \pm 0.0005$   |
| 276.73 | $0.77576 \pm 0.00018$ | $1.2361 \pm 0.0016$ | $1.3004 \pm 0.0011$   | $1.2200 \pm 0.0005$   | $1.4371 \pm 0.0009$   |

Table 10: Chem shifts, 1M glucose at pH=7.00, using restricted model, with partial assignment. Signals 6 to 9

| T(K)   | $C_{2,\alpha}$        | $C_{2,\beta}$         | $C_{1,\alpha}$        | $C_{1,\beta}$         |
|--------|-----------------------|-----------------------|-----------------------|-----------------------|
| 267.88 | $1.06316 \pm 0.00011$ | $1.24909 \pm 0.00016$ | $2.05641 \pm 0.00020$ | $2.81210 \pm 0.00030$ |
| 268.92 | $1.06199 \pm 0.00013$ | $1.24609 \pm 0.00025$ | $2.05779 \pm 0.00025$ | $2.80938 \pm 0.00035$ |
| 271.53 | $1.06047 \pm 0.00017$ | $1.2331 \pm 0.0010$   | $2.06362 \pm 0.00033$ | $2.8108 \pm 0.0005$   |
| 274.13 | $1.05868 \pm 0.00025$ | $1.2185 \pm 0.0022$   | $2.0695 \pm 0.0005$   | $2.8166 \pm 0.0007$   |
| 276.73 | $1.0599 \pm 0.0004$   | $1.2255 \pm 0.0034$   | $2.0726 \pm 0.0007$   | $2.8231 \pm 0.0011$   |

Table 11: Example defining the restricted exchange model of  $\sim 1M$  glucose at temperature of 269.5 K

| T=269.5K       | water <sup>†</sup> | $C_6$   | $C_{3/4\alpha}$ | $C_{3/4\beta}$ | $C_{3/4\alpha}$ | $C_{3/4\beta}$ | $C_{2,\alpha}$ | $C_{2,\beta}$ | $C_{1,\alpha}$ | $C_{1,\beta}$ |
|----------------|--------------------|---------|-----------------|----------------|-----------------|----------------|----------------|---------------|----------------|---------------|
| $\delta$ [PPM] | 0.0                | 0.78885 | 1.2299          | 1.37237        | 1.2198          | 1.43349        | 1.07148        | 1.25909       | 2.06430        | 2.81704       |
| $k_{ex}$ [Hz]  | calculated         | 372.2   | 207.2           | 207.2          | 169.0           | 169.0          | 177.8          | 177.8         | 102.25         | 242.4         |
| $c_{frac}$     | 110.0              | 1.0     | 0.36            | 0.64           | 0.36            | 0.64           | 0.36           | 0.64          | 0.36           | 0.64          |

<sup>†</sup> The water is used as a reference, therefore the chemical shift is zero. Exchange rate of water is calculated from the other exchange rates on the fly, so there is no need to specify it in the model. The fractional concentration of water is here set as 110 mol/l (of water hydrogen atoms). For confidence intervals of these parameters, see Tables 1, 6 and 7, from which this table is assembled. Note however, that the chemical shifts correspond to the temperature of  $\sim 295$  K since no extrapolation of those was attempted.

Table 12: Example defining the restricted exchange model for fitting at low temperature (270 K) and pH=6.21

|                | water <sup>†</sup> | $C_6^a$   | $C_{3/4\alpha}$ | $C_{3/4\beta}$        | $C_{3/4\alpha}$ | $C_{3/4\beta}$      | $C_{2,\alpha}$ | $C_{2,\beta}$       | $C_{1,\alpha}$ | $C_{1,\beta}$ |
|----------------|--------------------|-----------|-----------------|-----------------------|-----------------|---------------------|----------------|---------------------|----------------|---------------|
| $\delta$ [PPM] | 0.0                | 0.70-0.80 | 1.15-1.5        | 1.15-1.5              | 1.15-1.5        | 1.15-1.5            | 1.0-1.1        | 1.15-1.5            | 1.9-2.2        | 2.7-3.0       |
| $k_{ex}$ [Hz]  | calculated         | 20-1950   | 20-1950         | $\equiv \leftarrow^b$ | 20-1950         | $\equiv \leftarrow$ | 20-1950        | $\equiv \leftarrow$ | 20-1950        | 20-1950       |
| $c_{frac}$     | 110.0              | 1.0       | 0.36            | 0.64                  | 0.36            | 0.64                | 0.36           | 0.64                | 0.36           | 0.64          |

<sup>a</sup> Suitably narrow range is used where the assignment is obvious. The chemical shift can be estimated from the spectrum. <sup>b</sup> With the sign we indicate, that in this (restricted) model, the exchange rate of  $\beta$  is set equal to the  $\alpha$  on the left in the table. This way, the chemical shifts of corresponding  $\alpha$  and  $\beta$  (of the same carbon) are obtained during the fitting.

Table 13: Example defining the restricted exchange model for fitting at higher temperature (295 K), at pH=6.21. The chemical shift ranges are narrowed around the values obtained at low temperature to prevent swapping.

|                | water <sup>†</sup> | $C_6^a$   | $C_{3/4\alpha}$ | $C_{3/4\beta}$        | $C_{3/4\alpha}$ | $C_{3/4\beta}$      | $C_{2,\alpha}$ | $C_{2,\beta}$       | $C_{1,\alpha}$ | $C_{1,\beta}$ |
|----------------|--------------------|-----------|-----------------|-----------------------|-----------------|---------------------|----------------|---------------------|----------------|---------------|
| $\delta$ [PPM] | 0.0                | 0.70-0.80 | 1.15-1.25       | 1.30-1.40             | 1.20-1.22       | 1.4-1.5             | 1.0-1.1        | 1.2-1.3             | 1.9-2.2        | 2.7-3.0       |
| $k_{ex}$ [Hz]  | calculated         | 20-1950   | 20-1950         | $\equiv \leftarrow^b$ | 20-1950         | $\equiv \leftarrow$ | 20-1950        | $\equiv \leftarrow$ | 20-1950        | 20-1950       |
| $c_{frac}$     | 110.0              | 1.0       | 0.36            | 0.64                  | 0.36            | 0.64                | 0.36           | 0.64                | 0.36           | 0.64          |

Table 14: Parameters of the Eyring equation for exchange rates obtained by linear fit of the linearized Eyring equation. Note that parameters for pH=7.38 should be used only in low temperatures for estimates of exchange rates.

| pH             |           | 6.21 |                             |
|----------------|-----------|------|-----------------------------|
| site/parameter | $\kappa$  |      | $\Delta G^\ddagger$ [J/mol] |
| $C_6$          | 1.3749-06 |      | 2.22730e+04                 |
| $C_{3/4}$      | 1.5401-06 |      | 2.38401e+04                 |
| $C_{3/4}$      | 2.4989-05 |      | 3.05403e+04                 |
| $C_2$          | 8.2092-06 |      | 2.79324e+04                 |
| $C_{1,\alpha}$ | 1.6195-02 |      | 4.61731e+04                 |
| $C_{1,\beta}$  | 1.2615-03 |      | 3.85195e+04                 |

  

| pH             |           | 7.00 |                     |
|----------------|-----------|------|---------------------|
| site/parameter | $\kappa$  |      | $\Delta G^\ddagger$ |
| $C_6$          | 1.4289-05 |      | 2.81024e+04         |
| $C_{3/4}$      | 5.9687-05 |      | 3.19200e+04         |
| $C_{3/4}$      | 2.2834-03 |      | 4.00640e+04         |
| $C_2$          | 2.3088-04 |      | 3.50790e+04         |
| $C_{1,\alpha}$ | 2.4681-01 |      | 4.96645e+04         |
| $C_{1,\beta}$  | 7.1153-02 |      | 4.54870e+04         |

  

| pH             |           | 7.38 |                     |
|----------------|-----------|------|---------------------|
| site/parameter | $\kappa$  |      | $\Delta G^\ddagger$ |
| $C_6$          | 4.1509-02 |      | 4.55072e+04         |
| $C_{3/4}$      | 1.0688+03 |      | 6.82804e+04         |
| $C_{3/4}$      | 7.9775-04 |      | 3.67809e+04         |
| $C_2$          | 2.1281+03 |      | 7.00003e+04         |
| $C_{1,\alpha}$ | 5.7136+02 |      | 6.54245e+04         |
| $C_{1,\beta}$  | 2.8559+00 |      | 5.23164e+04         |
